# Supplementary material for: Giant ankyrin-B mediates transduction of axon guidance and collateral branch pruning factor sema 3A
Source: eLife journal article supplement (doi:10.7554/elife.69815), 2021-11-08
Supplement: fig1-data1 [file Figure 1-Figure Supplement 2-source data 1.xlsx]

## Sheet: Figure 1-Figure Supp 2
	DIV1 Neurite Count
	Control	AnkB220 KO	AnkB440 KO
	5	5	8
	5	4	5
	4	4	6
	6	4	6
	6	5	4
	4	6	5
	5	5	7
	3	4	4
	7	4	8
	4	5	5
	5	5	8
	6	4	5
	5	5	5
	4	4	5
	4	4	5
	4	4	4
	5	4	5
	5	5	7
	7	5	7
