# Supplementary material for: Giant ankyrin-B mediates transduction of axon guidance and collateral branch pruning factor sema 3A
Source: eLife journal article supplement (doi:10.7554/elife.69815), 2021-11-08
Supplement: fig1-data1 [file Figure 1-Figure Supplement 3-source data 1.xlsx]

## Sheet: Figure 1
	DIV1 axon length (μm)							Branches > 10 μm/100 μm axon
	Control	AnkB220 KO	AnkB440 KO	AnkB440 KO + AnkB440	AnkB440 KO + AnkB220			Control	AnkB220 KO	AnkB440 KO	AnkB440 KO + AnkB440	AnkB440 KO + AnkB220
	94.904	67.992	119.793	134.823	124.892			0	0	3	3	4
	162.762	69.299	119.992	111.87	109.382			1	2	2	2	3
	135.82	60.441	157.742	123.812	105.783			1	2	4	1	3
	167.672	49.691	102.561	109.892	99.823			1	1	3	2	4
	123.618	62.197	87.932	107.631	127.673			0	0	4	2	3
	103.762	79.794	90.781	133.893	118.672			1	1	3	3	4
	112.671	92.963	109.481	147.623	121.781			1	0	5	1	4
	99.042	45.787	112.671	126.826	120.782			2	1	4	1	5
	102.832	68.033	103.87	118.563	117.671			2	1	5	2	3
	101.781	68.279	118.923	108.783	119.782			2	2	4	1	2
	98.782	49.995	139.671	138.678	130.816			2	1	3	3	4
	118.72	61.682	123.678	136.892	119.782			2	1	4	2	3
	123.561	78.712	102.781	127.673	102.676			3	0	4	1	5
	101.038	76.321	114.78	118.932	119.893			1	0	5	0	3
								1	1	4	1	4
								0	1	2	0	3
	DIV5 axon length (μm)							2	2	6	2	5
	Control	AnkB220 KO	AnkB440 KO	AnkB440 KO + AnkB440	AnkB440 KO + AnkB220
	260.456	204.72	287.473	302.782	321.784			Branches/120 μm axon length
	267.901	189.563	285.023	267.561	302.678			Control	AnkB220 KO	AnkB440 KO
	278.932	220.453	282.671	276.561	342.302			0.803516	0	1.07763
	302.781	178.462	273.821	234.782	245.786			0	0.607095	1.74744
	289.721	200.673	270.652	256.892	278.892			0.781268	1	1.05475
	310.892	150.673	264.834	278.782	310.893			0	0.830186	2.02403
	278.903	87.902	298.492	289.67	256.129			0.610299	0	1.49141
	269.584	99.782	302.882	260.023	270.62			0.838146	0	1.75259
	284.892	129.782	289.563	267.783	248.902			1.16081	0	1
	278.93	110.892	280.843	303.896	267.782			0	1	2
	270.864	217.134	294.783	267.892	287.671			0.975829	1	1
	256.893	88.858	301.672	289.031	260.092			1	1	3
	321.783	112.763	267.436	245.782	276.782			0	0	2
	303.744	167.392	288.491	278.459	258.902			1	0	4
	304.821	128.392	278.546	290.673	301.892			0	2	2
	287.493	134.782						1	0	3
		89.893						1	1	2
								2	0	1
								0	0	3
								1	0	3
								1	1	3
								2	1	3
								0	0	4
								0	0	3
								0	1	0
								0	0	0
								1	0	1
								0	0	2
								1	2	2
								1	1
								0	1
								1	1
									0
									1
									0
									1
