# Supplementary material for: Giant ankyrin-B mediates transduction of axon guidance and collateral branch pruning factor sema 3A
Source: eLife journal article supplement (doi:10.7554/elife.69815), 2021-11-08
Supplement: fig1-data1 [file Figure 1-Figure Supplement 4-source data 1.xlsx]

## Sheet: Figure 1-Figure Supp 4
								Velocity (μm/s)								Velocity (μm/s)
			% motile particles					Antero	Retrog	Antero	Retrog	Antero	Retrog			Antero	Retrog	Antero	Retrog	Antero	Retrog
			Control	AnkB220 KO	AnkB440 KO			Control		AnkB220 KO		AnkB440 KO				Control		AnkB220 KO		AnkB440 KO
			66.6667	33.3333	61.1111			0.79	-0.193	0.859	-0.285	0.707	-3.049			18.971	-5.991	75.922	-94.698	69.92	-163.812
			70.8333	38.4615	75			0.466	-0.2	0.699	-0.291	0.58	-0.649			18.971	-10.983	41.957	-97.767	69.92	-163.812
			69.2308	33.3333	75			0.852	-0.207	0.699	-1.889	0.7	-0.999			15.975	-11.981	20.979	-119.877	69.92	-163.812
			86.6667	54.5455	66.6667			2.671	-0.207	0.768	-2.606	0.396	-1.748			11.981	-20.968	12.987	-100.897	69.92	-163.812
			75	33.3333	75			0.852	-0.223	0.43	-1.421	0.586	-1.291			5.991	-32.949	7.992	-129.969	69.92	-163.812
			85.7143	42.8571	80			0.466	-0.235	0.361	-1.443	0.887	-3.232			2.995	-45.929	0.999	-18.981	54.937	-143.835
			76.9231	31.25	60			1.573	-0.2495	0.304	-0.571	0.7	-2.397			206.217	-52.918	61.937	-17.982	54.937	-143.835
			68.75	46.6667	66.6667			1.147	-0.269	2.398	-1.061	0.58	-2.023			220.242	-157.756	11.988	-6.993	54.937	-115.867
			60	33.3333	76.9231			0.433	-0.277	2.416	-0.87	0.715	-2.129			133.484	-175.728	79.918	-2.997	54.937	-115.867
			72.7273	46.1538	75			0.499	-0.282	2.497	-0.276	2.113	-2.671			133.639	-183.639	11.988	-3.996	54.937	-115.867
			60	33.3333	76.4706			0.522	-0.282	2.398	-0.385	1.398	-2.781			175.728	-133.484	8.991	-3.996	28.967	-114.868
			80	37.5	86.6667			1.331	-0.282	2.398	-0.385	0.432	-2.397			129.753	-190.242	2.997	-3.996	28.967	-114.868
			66.6667	41.6667	76.9231			0.726	-0.283	1.284	-0.385	0.736	-1.998			71.889	-136.217	6.993	-3.996	28.967	-114.868
			70.5882	35.2941	75			0.777	-0.285	1.284	-0.305	1.962	-1.488			65.898	-3.994	79.918	-3.996	28.967	-114.868
			68.421	42.8571	71.4286			1.116	-0.285	1.333	-0.272	2.127	-1.146			53.917	-3.994	61.937	-4.995	28.967	-114.868
								2.0585	-0.3035	1.436	-0.355	0.999	-0.272			35.944	-3.994	22.976	-4.995	13.984	-109.874
								0.773	-0.307	1.284	-1.885	0.474	-0.636			14.977	-4.992	11.988	-5.994	13.984	-109.874
								1.034	-0.312	1.284	-1.598	2.508	-0.291			14.977	-4.992	11.988	-6.993	13.984	-109.874
								0.444	-0.352	1.284	-1.626	1.049	-1.291			13.978	-4.992	95.697	-6.993	13.984	-109.874
								1.285	-0.364	1.505	-1.745	1.997	-0.649			11.981	-5.991	227.767	-7.992	13.984	-109.874
								0.357	-0.382	1.302	-0.607	1.498	-0.999			9.985	-5.991	121.875	-8.991	6.992	-97.888
								0.403	-0.392	1.284	-0.764	2.188	-2.049			9.985	-5.991	119.877	-9.99	6.992	-94.891
								0.403	-0.399	1.284	-0.757	2.113	-1.748			8.986	-5.991	89.908	-11.988	6.992	-94.891
								0.357	-0.399	1.284	-0.285	1.435	-2.397			8.986	-5.991	71.926	-11.988	6.992	-94.891
								0.817	-0.408	1.627	-0.607	1.146	-2.27			7.988	-5.991	37.961	-11.988	6.992	-94.891
								0.828	-0.412	1.284	-0.786	0.58	-1.488			5.991	-6.989	26.972	-12.987	2.997	-94.891
								1.155	-0.412	1.284	-0.832	0.421	-1.373			5.991	-7.988	23.975	-16.983	2.997	-88.898
								0.818	-0.4225	1.284	-0.666	1.496	-1.465			5.991	-8.986	22.976	-16.983	2.997	-88.898
								0.817	-0.4235	0.994	-1.165	0.874	-1.665			3.994	-9.985	19.98	-17.982	2.997	-88.898
								0.817	-0.441	0.908	-0.583	0.636	-1.488			2.995	-10.983	9.99	-17.982	2.997	-88.898
								0.817	-0.444	1.284	-0.721	1.962	-2.231			2.995	-12.98	9.99	-26.972	2.997	-88.898
								0.818	-0.444	1.443	-0.222	2.188	-1.146			2.995	-13.978	8.991	-27.971	2.997	-83.904
								1.155	-0.447	1.629	-0.277	1.077	-0.296			2.995	-14.977	7.992	-33.965	2.997	-83.904
								0.828	-0.474	1.427	-0.314	0.553	-0.636			2.995	-14.977	7.992	-40.958	83.904	-83.904
								2.455	-0.478	1.427	-0.619	2.508	-0.555			2.995	-15.975	7.992	-42.956	83.904	-83.904
								1.2275	-0.4905	1.742	-1.284	2.113	-0.649			56.855	-15.975	6.993	-46.952	83.904	-80.907
								1.631	-0.498	1.165	-0.333	1.252	-0.999			56.855	-15.975	6.993	-53.945	83.904	-80.907
								0.499	-0.499	1.267	-0.499	1.435	-1.291			11.969	-16.974	6.993	-54.944	73.915	-80.907
								0.749	-0.499	1.176	-0.222	1.146	-1.748			11.969	-16.974	6.993	-54.944	73.915	-75.913
								0.749	-0.499	1.11	-2.05	0.421	-2.733			9.975	-18.971	6.993	-82.915	73.915	-75.913
								0.749	-0.565	0.61	-1.79	0.496	-2.27			9.975	-20.968	5.994	-67.828	73.915	-75.913
								0.9	-0.565	2.664	-1.003	1.398	-3.496			4.987	-25.96	4.995	-3.996	73.915	-75.913
								0.9	-0.59	0.535	-0.87	0.736	-3.232			4.987	-28.955	4.995	-3.996	69.92	-75.913
								0.749	-0.597	0.999	-1.055	1.962	-2.397			4.987	-33.948	3.996	-5.994	69.92	-73.915
								0.749	-0.599	1.117	-0.959	1.498	-1.998			4.987	-40.937	2.997	-5.994	69.92	-73.915
								0.749	-0.599	0.505	-0.87	2.188	-1.488			136.883	-40.937	98.843	-6.994	69.92	-73.915
								0.789	-0.599	0.333	-1.037	0.874	-1.373			136.883	-56.912	119.852	-6.994	69.92	-73.915
								1.059	-0.599	0.372	-0.973	2.049	-1.465			138.646	-70.89	101.905	-10.99	69.92	-73.915
								0.749	-0.599	0.471	-0.87	1.758	-1.665			138.646	-75.883	101.905	-10.99	69.92	-69.92
								0.749	-0.599	1.998	-1.055	0.929	-1.146			109.72	-83.87	84.921	-10.99	69.92	-69.92
								0.749	-0.599	0.908	-1.28	0.7	-2.64			109.72	-88.863	84.921	-10.99	69.92	-69.92
								0.749	-0.599	0.908	-1.624	0.623	-0.499			92.763	-97.849	75.93	-12.988	69.92	-69.92
								0.749	-0.607	0.908	-1.231	0.499	-2.686			92.763	-117.818	75.93	-12.988	69.92	-69.92
								0.9	-0.607	0.918	-1.126	1.452	-0.499			80.794	-119.815	43.959	-18.982	69.92	-64.926
								0.9	-0.607	1.253	-1.061	1.498	-2.188			80.794	-126.804	43.959	-18.982	69.92	-46.946
								0.749	-0.607	0.656	-1.061	0.465	-2.188			55.857	-142.779	29.972	-24.977	69.92	-46.946
								0.749	-0.607	1.069	-0.999	0.713	-2.331			55.857	-158.755	29.972	-24.977	69.92	-45.947
								0.722	-0.607	0.361	-0.999	0.485	-1.291			50.87	-198.693	20.981	-34.968	64.926	-45.947
								1.116	-0.628	0.333	-0.999	0.495	-1.488			50.87	-175.574	20.981	-34.968	54.937	-45.947
								1.116	-0.628	0.385	-1.267	0.666	-1.146			36.906	-2.992	8.992	-35.967	54.937	-43.95
								0.998	-0.634	0.494	-1.176	0.486	-0.636			36.906	-2.992	8.992	-35.967	54.937	-15.982
								2.458	-0.6655	0.38	-1.11	0.303	-2.762			23.939	-3.99	5.994	-53.95	54.937	-15.982
								1.229	-0.67	0.35	-1.036	2.159	-2.188			23.939	-3.99	5.994	-53.95	54.937	-15.982
								0.541	-0.67	0.35	-2.303	1.137	-1.291			15.959	-8.977	5.994	-70.841	54.937	-15.982
								1.573	-0.67	0.43	-2.248	1.2	-1.373			15.959	-8.977	5.994	-14.986	54.937	-15.982
								1.387	-0.67	1.598	-2.46	1.116	-1.665			13.964	-10.972	4.995		54.937	-11.986
								0.332	-0.67	0.375	-2.248	0.832	-2.188			13.964	-10.972	4.995		54.937	-11.986
								0.831	-0.67	0.53	-2.303	0.318	-2.762			9.975	-30.921	108.843		54.937	-11.986
								2.494	-0.676	0.395	-1.666	2.189	-1.758			9.975	-30.921	119.852		50.942	-11.986
								0.342	-0.695	0.375	-1.453	1.232	-1.789			8.977	-33.913	100.906		50.942	-11.986
								1.387	-0.695	0.136	-1.443	1.113	-0.638			8.977	-33.913	100.906		50.942	-6.992
								2.332	-0.695	0.999	-0.154		-2.188			8.977	-38.901	48.955		50.942	-3.994
								0.831	-0.695	0.263	-0.346		-1.758			8.977	-38.901	48.955		50.942	-3.994
								0.342	-0.695	0.908	-0.571		-0.937			8.977	-48.875	75.93		46.946	-10.972
								0.997	-0.695	0.247	-0.571					8.977	-48.875	75.93		46.946	-3.995
								1.995	-0.695	2.739	-0.61					8.977	-77.801	39.963		45.947	-3.995
								0.606	-0.698	1.911	-0.807					8.977	-77.801	39.963		45.947	-3.995
								0.911	-0.703	1.422	-0.61					7.98	-106.727	20.981		45.947	-3.995
								0.984	-0.706	0.545	-0.571					7.98	-106.727	20.981		43.95	-3.995
								1.777	-0.706	0.999	-1.07					5.985	-134.656			32.962	-3.995
								0.472	-0.706	0.263	-0.914					5.985	-134.656			32.962	-3.995
								2.556	-0.726	0.908	-0.263					5.985	-136.883			32.962	-3.995
								0.89	-0.734	0.247	-1.893					5.985	-136.883			32.962	-3.995
									-0.749	1.3456	-0.856					5.985	-10.972			32.962	-4.994
									-0.749	1.911	-0.311					5.985	-10.972			13.984	-4.994
									-0.749		-0.193					4.987	-12.967			13.984	-4.994
									-0.749		-0.235					4.987	-12.967			13.984	-4.994
									-0.749		-0.22					4.987	-13.964			13.984	-4.994
									-0.749		-0.795					4.987	-13.964			13.984	-5.993
									-0.749		-0.311					4.987	-13.964			11.986	-5.993
									-0.749		-0.204					4.987	-13.964			11.986	-5.993
									-0.749		-0.143					4.987	-14.962			11.986	-5.993
									-0.772		-0.914					4.987	-14.962			11.986	-5.993
									-0.772		-0.263					4.987	-15.959			11.986	-6.992
									-0.772		-1.893					4.987	-15.959			7.991	-6.992
									-0.772		-0.856					3.99	-19.949			7.991	-6.992
									-0.772		-0.193					3.99	-19.949			7.991	-6.992
									-0.772		-0.235					3.99	-25.934			7.991	-6.992
									-0.777		-0.795					3.99	-25.934			7.991	-6.992
									-0.777							3.99	-33.913			6.992	-6.992
									-0.777							3.99	-33.913			6.992	-6.992
									-0.787							2.992	-38.901			6.992	-6.992
									-0.789							2.992	-38.901			6.992	-9.989
									-0.79								-47.878			6.992	-9.989
									-0.808								-47.878			6.992	-9.989
									-0.815								-73.811			6.992	-9.989
									-0.817								-73.811			6.992	-9.989
									-0.845								-77.801			6.992	-12.985
									-0.845								-77.801			6.992	-12.985
									-0.845								-88.773			6.992	-12.985
									-0.845								-88.773			6.992	-13.984
									-0.845								-108.722			6.992	-13.984
									-0.847								-108.722			6.992	-13.984
									-0.847								-191.511			6.992	-13.984
									-0.847								-191.511			4.994	-13.984
									-0.847											4.994	-13.984
									-0.847											4.994	-13.984
									-0.847											4.994	-13.984
									-0.856											4.994	-13.984
									-0.873											4.994	-13.984
									-0.881											4.994	-14.983
									-0.895											4.994	-14.983
									-0.9											4.994	-14.983
									-0.9											4.994	-14.983
									-0.9											3.995	-14.983
									-0.909											3.995	-14.983
									-0.937											3.995	-14.983
									-0.943											3.995	-14.983
									-0.944											3.995	-14.983
									-0.971											143.835	-14.983
									-0.981											118.864	-15.982
									-0.981											118.864	-15.982
									-0.982											118.864	-15.982
									-0.982											118.864	-15.982
									-0.998											118.864	-15.982
									-0.998											73.915	-15.982
									-0.998											73.915	-15.982
									-0.998											73.915	-15.982
									-1.023											69.92	-15.982
									-1.059											69.92	-15.982
									-1.065											69.92	-24.971
									-1.065											69.92	-24.971
									-1.065											69.92	-24.971
									-1.09											84.903	-24.971
									-1.091												-24.971
									-1.106												-38.955
									-1.116												-38.955
									-1.116												-38.955
									-1.116												-41.952
									-1.132												-41.952
									-1.132												-41.952
									-1.136												-43.95
									-1.169												-45.947
									-1.169												-45.947
									-1.171												-45.947
									-1.189												-46.946
									-1.2												-46.946
									-1.248												-47.945
									-1.248												-47.945
									-1.2715												-47.945
									-1.274												-47.945
									-1.296												-47.945
									-1.312												-48.944
									-1.33												-48.944
									-1.331												-48.944
									-1.346												-57.934
									-1.378												-57.934
									-1.392												-57.934
									-1.437												-57.934
									-1.445												-57.934
									-1.45												-62.928
									-1.498
									-1.498
									-1.498
									-1.6195
									-1.6195
									-1.747
									-1.747
									-1.755
									-1.78
									-1.78
									-1.787
									-1.787
									-1.787
									-1.787
									-1.796
									-1.8
									-1.8
									-1.802
									-1.802
									-1.854
									-1.854
									-1.8545
									-1.861
									-1.861
									-1.861
									-1.861
									-1.861
									-1.875
									-1.901
									-1.905
									-1.9065
									-1.918
									-1.9265
									-1.9265
									-1.9265
									-1.9265
									-1.927
									-1.942
									-1.952
									-2.012
									-2.012
									-2.013
									-2.0135
									-2.014
									-2.021
									-2.023
									-2.024
									-2.032
									-2.0395
									-2.0405
									-2.047
									-2.047
									-2.047
									-2.047
									-2.05
									-2.057
									-2.0585
									-2.0605
									-2.0885
									-2.0915
									-2.093
									-2.1
									-2.1
									-2.1
									-2.106
									-2.106
									-2.1085
									-2.1105
									-2.1215
									-2.144
									-2.144
									-2.182
									-2.183
									-2.1905
									-2.203
									-2.2075
									-2.2075
									-2.2075
									-2.2075
									-2.2075
									-2.2075
									-2.208
									-2.209
									-2.2095
									-2.216
									-2.2205
									-2.2205
									-2.2245
									-2.2285
									-2.232
									-2.232
									-2.232
									-2.232
									-2.238
									-2.238
									-2.2465
									-2.2485
									-2.255
									-2.256
									-2.2575
									-2.258
									-2.2635
									-2.2635
									-2.2635
									-2.2635
									-2.2635
									-2.2865
									-2.2865
									-2.287
									-2.287
									-2.287
									-2.312
									-2.319
									-2.321
									-2.338
									-2.338
									-2.338
									-2.34
									-2.346
									-2.36
									-2.366
									-2.371
									-2.374
									-2.374
									-2.39
									-2.3995
									-2.409
									-2.415
									-2.44
									-2.441
									-2.4585
									-2.4585
									-2.4605
									-2.4625
									-2.463
									-2.476
									-2.478
									-2.488
									-2.494
									-2.504
									-2.504
									-2.504
									-2.507
									-2.5105
									-2.5105
									-2.5105
									-2.513
									-2.519
									-2.519
									-2.519
									-2.519
									-2.519
									-2.543
									-2.543
									-2.543
									-2.543
									-2.552
									-2.552
									-2.577
									-2.584
									-2.584
									-2.6045
									-2.6045
									-2.6045
									-2.6045
									-2.6045
									-2.605
									-2.605
									-2.652
									-2.652
									-2.652
									-2.652
									-2.658
									-2.658
									-2.663
									-2.7225
									-2.7225
									-2.7565
									-2.769
									-2.7895
									-2.7895
									-2.7895
									-2.7995
									-2.8015
									-2.8015
									-2.911
									-2.978
									-3.032
									-3.097
									-3.307
									-3.374
									-3.374
									-3.374
