# Supplementary material for: Giant ankyrin-B mediates transduction of axon guidance and collateral branch pruning factor sema 3A
Source: eLife journal article supplement (doi:10.7554/elife.69815), 2021-11-08
Supplement: fig1-data1 [file Figure 1-source data 4.xlsx]

## Sheet: Figure 1
	Actin patches/20 μm/3 min							% actin patches that become filopodia
	Control	AnkB220 KO	AnkB440 KO	AnkB440 KO + AnkB440	AnkB440 KO + AnkB220			Control	AnkB220 KO	AnkB440 KO	AnkB440 KO + AnkB440	AnkB440 KO + AnkB220
	6	6	10	5	9			20	20	33.3	22.6	32.3
	4.6	6	8	6	7			25	12	27.2	25.8	35
	4.8	5	8.6	5.2	6			16.6	14.8	42.8	21.4	25
	5	4	7.8	4.6	7			20	20	33.3	20.2	30
	4.8	5.2	8.2	4.4	8			16.6	16.6	40	26.8	30.5
	5	5	9	3.8	6			20	20	27.2	22.8	33
	4	4	9.4	4.2	7			4	22.6	20	14.2	31.8
	4	4.2	10	4	5			25	12	28.5	16.3	26.2
	5.2	3.8	6	3.4	6.6			7	8	16.6	24	22.5
	4.4	4	8.6	3	7.2			20	16.6	37.5	17.3	21
	4.2	5	7.6	5.8	8			20	20	27.2	16.9	30.5
	4.5	4.2	8	6	7.8			12	5	33.3	21	30
	5	4.2	7	5	8			10	3	33.3	9	33.3
	5.2	4	6.8	5	8.2			20	25	30	10	28.5
		3	7.4					10	24.6	33.3	19
										37.5
	Patch lifespan (s)							Actin protussions/60 μm axon
	Control	AnkB220 KO	AnkB440 KO	AnkB440 KO + AnkB440	AnkB440 KO + AnkB220			Control	AnkB220 KO	AnkB440 KO	AnkB440 KO + AnkB440	AnkB440 KO + AnkB220
	30	31	23	23	21			4	3	11	5	10
	23	23	24	22	22			6	1	20	4	9
	25	23	25	22	21			3	6	17	5	11
	25	20	22	23	21			4	4	13	5	13
	31	18	22	21	22			5	6	16	3	11
	22	15	24	22	20			7	3	13	4	8
	25	22	24	23	23			7	3	10	6	9
	25	23	27	24	24			5	5	10	7	12
	26	21	21	25	22			3	4	8	8	11
	26	23	22	25	23			5	3	14	4	13
	24	19	20	22	22			6	2	11	4	12
	26	20	20	20	21			4	6	9	4	11
	23	23	21	21	22			7	7	10	4	9
	18	33	28	22	24			6		17	3	8
	23	23	23	23	24			5		8		9
	22	24	27	19	24
	25	22	28	17	23
	24	25	24	16	24
	23	28	25	15	21
	24	30	23	23	21
	26	31	25	22	22
	23	27	23	23	24
	23	23	21	21	24
	23	22	25	22	26
	25	20	23	26	24
	23	23	21	25	22
	21	19	22	22	21
	19	19	24	29	19
	20	28	24	23	26
	22	22	25	24	16
	25	21	23	26	17
	18	23	21	23	23
	22	19	22	23	21
	25	20	25	22	22
	23	26	26	23	21
	27	24	32	21	24
	24	24	22	22	26
	26	22	24	26	24
	24	24	26	24	25
	24	19	28	24	23
	25	22	32	30	27
	22	21	22	31	24
	21	24	21	22	22
	20	22	22	21	21
	27	21	27	22	20
	22	22	24	21	23
	23	20	22	21	21
	25	26	22	18	22
	25	22	21	18	22
	22	22	22	21	19
