# Supplementary material for: Giant ankyrin-B mediates transduction of axon guidance and collateral branch pruning factor sema 3A
Source: eLife journal article supplement (doi:10.7554/elife.69815), 2021-11-08
Supplement: fig2-data1 [file Figure 2-Figure Supplement 1-source data 1.xlsx]

## Sheet: Figure 2-Figure Supp 1
		Distance from midline (μm)	Control						AnkB440 KO
		0	328.787	305.588	368.645	366.426			345.391	410.706	384.138	383.036	473.805
		50	329.9	304.433	366.435	354.255			340.409	386.914	370.3	367.534	454.435
		100	325.473	293.363	363.114	351.486			332.108	365.879	362.557	358.142	431.188
		150	324.935	290.599	362.558	359.243			324.358	354.25	347.632	345.948	414.581
		200	318.288	281.202	355.923	352.037			309.423	334.324	342.624	328.233	391.351
		250	311.632	265.134	349.265	347.613			298.922	317.174	339.318	326.034	379.712
		300	313.295	263.473	330.502	336.535			292.267	303.882	331.003	313.305	352.59
		350	304.433	262.955	317.774	317.728			285.63	282.307	311.133	303.365	339.303
		400	290.05	258.519	315.502	306.096			272.328	270.673	293.923	295.592	307.2
		450	268.457	251.89	286.736	298.909			264.598	281.743	254.077	287.847	295.577
		500	267.346	250.742	290.053	285.611			255.171	274.002	242.503	271.779	297.245
		Cortical layer thickness (µm)	Control						AnkB440 KO
		Total	614.397	559.599	464.949	538.012			526.389	508.123	509.783	494.838	536.352
		SATB2	539.673	481.554	401.849	440.041			361.996	428.417	435.059	418.454	466.069
		CTIP2	210.334	171.035	134.503	185.98			164.393	180.998	184.319	152.769	187.64
		TBR1	265.685	209.227	185.98	182.658			192.622	162.732	209.227	176.016	185.98
