# Supplementary material for: Giant ankyrin-B mediates transduction of axon guidance and collateral branch pruning factor sema 3A
Source: eLife journal article supplement (doi:10.7554/elife.69815), 2021-11-08
Supplement: fig2-data1 [file Figure 2-source data 1.xlsx]

## Sheet: Figure 2
			CC thickness
		Distance from midline (μm)	Control					AnkB440 KO
		0	456.094	368.64	379.723	462.735		405.908	653.146	456.105	498.33
		50	465.509	358.151	388.572	458.863		395.947	658.683	467.733	490.94
		100	459.415	352.601	379.708	443.923		395.582	660.342	466.626	489.231
		150	466.613	366.438	368.639	432.852		404.436	676.951	491.538	481.264
		200	475.484	361.446	371.406	440.045		409.233	654.264	508.126	502.329
		250	483.216	362.55	360.356	417.916		410.339	611.635	496.501	502.31
		300	453.889	356.488	367.531	415.146		382.291	553.521	442.261	469.888
		350	430.084	348.777	360.377	415.134		355.727	504.255	432.848	423.823
		400	414.598	334.337	353.161	389.12		346.892	457.207	406.841	416.981
		450	387.473	331.562	358.684	364.214		338.38	443.363	389.679	377.729
		500	365.317	319.934	351.517	350.939		323.625	421.233	380.829	340.749
			AC thickness
		Distance from midline (μm)	Control				AnkB440 KO
		0	408.25	404	401.671		459.077	454.167	455.672
		50	399	403.75	390.784		457.385	450.769	441.923
		100	387.5	381.25	378.782		444.615	430.769	429.782
		150	373.75	370.75	376.892		430.769	428.462	420.902
		200	368.75	368.75	363.862		412.308	415	418.561
		250	363.125	368.75	358.792		406.154	410	399.781
		300	365.75	350	351.372		393.846	393.615	380.345
		350	356.25	331.25	342.677		389.167	383.846	371.702
			Area (μm2)
			Control				AnkB440 KO
		Medial Septal Nucleus	185485	189382	190782		192840	189702	191678
		Septofimbrial Nucleus	216649	227834	236810		263333	273012	285623
		Fornix	76170.7	95442.2	82321.2		74000	82933.3	80671.3
		Ventral Hippocampal Commissure	22834.7	23777.8	24378.4		28897.5	28934.9	32674.9
