# Supplementary material for: Giant ankyrin-B mediates transduction of axon guidance and collateral branch pruning factor sema 3A
Source: eLife journal article supplement (doi:10.7554/elife.69815), 2021-11-08
Supplement: fig3-data1 [file Figure 3-Figure Supplement 1-source data 7.xlsx]

## Sheet: Figure 3-Figure Supp 1
		AnkB440 signal intensity								RQ Transcript
		DIV 1	DIV 2	DIV 3	DIV 4	DIV 5	DIV 6		Target	Brain			OPCs			SKM			BAT
		105.933	121.927	130.64	134.598	117.767	120.141		AnkB440	1	1	1	0.005	0.006	0.015	nd	nd	nd	nd	nd	nd
		106.994	119.311	130.976	118.301	119.939	117.175		MBP UTR-3	1	1	1	11.073	6.52	13.583	nd	nd	nd	nd	nd	nd
		114.113	123.129	128.372	126.604	128.999	114.697		AnkBpan	1	1	1	0.289	0.215	0.267	0.414	0.456	0.489	0.327	0.31	0.372
		146.908	120.885	148.791	132.426	131.737	112.743
		140.298	119.121	132.94	130.764	127.842	117.993
		138.886	117.859	138.468	141.734	121.031	114.225
		150.197	139.517	108.672	132.125	114.879	127.129
		126.152	118.774	112.288	131.98	122.374	119.211
		130.748	114.471	114.704	129.376	123.709	124.183
		115.729	117.931	113.603	128.825	134.158	118.943
		122.359	125.634	114.027	129.305	113.768	122.607
		115.378	114.492	117.423	124.49	132.579	123.538
		114.18	114.027	113.637	122.461	119.71	120.48
		123.741	118.848	112.028	163.098	111.019	115.631
		120.645	114.049	164.833	124.673	121.152	119.229
		128.556	116.069	110.355	140.36	135.684	165.512
		138.5	199.59	111.909	205.588	124.383	194.554
		118.796	235.073	142.078	237.622	120.752	151.866
		117.579	173.709	114.193	195.932	166.637	132.917
		115.823	171.496	113.801	179.073	173.361	141.272
		113.334	167.255	144.804	187.595	139.278	141.658
		120.114	194.934	168.183	188.349	147.559	143.495
		115.955	162.101	187.109	174.326	141.075	148.053
		116.358	173.139	179.431	159.301	140.031	132.225
		125.621	145.846	167.424	224.857	173.197	146.355
		110.825	121.084	155.784	175.675	153.349	133.146
		110.47	116.623	153.295	119.31	132.184	124.322
		119.557	118.857	154.447	119.529	114.125	128.842
		118.043	121.625	163.153	120.977	128.82	138.986
		124.131	120.42	192.354	113.299	147.571	134.516
		127.689	124.634	122.035	115.633	142.164	127.56
		112.467	129.395	117.419	145.534	133.761	154.556
		113.596	128.182	126.528	144.474	128.088	126.162
		143.695	124.132	119.749	127.141	134.241	124.281
		145.534	122.52	122.554	138.834	129.127	142.272
		148.105	128.133	114.96	149.945	139.783	149.272
		144.295	131.265	122.477	151.593	137.072	128.049
		136.432	136.155	127.412	146.785	162.026	141.667
		137	125.869	136.954	163.811	138.159
		140.132		120.666	126.551
		134.458			140.572
		137.634			124.213
		138.111			122.464
		125.773			147.229
		122.298			151.015
		152.68			130.545
		130.349			135.603
		136.476
		133.092
		131.093
		129.934
		115.305
		122.428
		133.544
		160.153
		136.62
		133.583
		153.365
