# Supplementary material for: Giant ankyrin-B mediates transduction of axon guidance and collateral branch pruning factor sema 3A
Source: eLife journal article supplement (doi:10.7554/elife.69815), 2021-11-08
Supplement: fig3-data1 [file Figure 3-Figure Supplement 2-source data 1.xlsx]

## Sheet: Figure 3-Fig Supp 2
	Olig2+ cell count
	Control	221	269	227	238
	AnkB440 KO	221	230	245
	Olig2+ cell density
	Control	0.0244755	0.0244734	0.0244282	0.0258541
	AnkB440 KO	0.020969	0.022273	0.0229951
