# Supplementary material for: Giant ankyrin-B mediates transduction of axon guidance and collateral branch pruning factor sema 3A
Source: eLife journal article supplement (doi:10.7554/elife.69815), 2021-11-08
Supplement: fig3-data1 [file Figure 3-source data 9.xlsx]

## Sheet: Figure 3
	Axon Area (um)	Control	AnkB440 KO			g-ratio					myelinated axons/μm2
	0.805732	0.806324				Control	AnkB440 KO				Control	AnkB440 KO
	0.741401	0.860395				0.781209	0.814953			mouse 1	1.13587	0.716064
	0.68949	0.82679				0.673607	0.793569			mouse 2	0.894435	1.2169
	0.944904	0.860465				0.746048	0.721932			mouse 3	1.09218	0.970642
	0.911146	0.795177				0.714853	0.758199
	0.850955	0.784057				0.683174	0.765266
	0.81242	0.811446				0.730258	0.77366
	0.876433	0.823401				0.759514	0.757937				total axon/area
	1.27388	0.85725				0.826395	0.773784				Control	AnkB440 KO
	0.552229	0.734717				0.83095	0.737746			mouse 1	112	210
	0.83121	0.865517				0.647012	0.764437			mouse 2	92	156
	0.737898	0.8265				0.734137	0.687225			mouse 3	109	116
	0.889809	0.824982				0.714669	0.698715
	0.804459	0.76247				0.806324	0.881154
	0.878025	0.800508				0.860395	0.831196			MBP intensity (A.U.)
	0.759554	0.852411				0.82679	0.834523			Control	1.87839e+07	2.39518e+07	1.17843e+07	8.77493e+06
	0.661146	0.773603				0.860465	0.76951			AnkB440 KO	1.22068e+07	2.73118e+07	1.02199e+07
	0.802548	0.839286				0.795177	0.829162
	1.04363	0.855966				0.784057	0.850222
	0.837898	0.836564				0.811446	0.827881				Protein level fold-change (relative to control)
	0.960828	0.781571				0.823401	0.800087			AnkB440 KO	Mbp	Plp	CNPase	MAG	MOG
	0.760828	0.817915				0.85725	0.870206				1.05218	1.21816	1.1869	1.3553	1.77444
	0.901592	0.853055				0.734717	0.775458				1.34225	1.44095	1.43096	1.09925	1.60082
	1.04777	0.750456				0.865517	0.831185				1.63095	1.5412	0.689877	0.859094	0.827657
	0.817516	0.816907				0.8265	0.811087
	0.788535	0.722132				0.824982	0.736337
	0.816242	0.820913				0.76247	0.700344
	0.796178	0.7532				0.800508	0.797563
	0.720064	0.82176				0.852411	0.782946
	1.12803	0.837662				0.773603	0.784007
	1.11401	0.818754				0.839286	0.860404
	0.975478	0.788443				0.855966	0.661238
	1.41847	0.834306				0.836564	0.765896
	1.12834	0.828394				0.781571	0.827419
	0.643312	0.772772				0.817915	0.853693
	1.24713	0.782431				0.853055	0.881905
	0.724841	0.740334				0.750456	0.818668
	0.717516	0.707057				0.816907	0.839382
	0.555732	0.826934				0.722132	0.776384
	0.979299	0.826992				0.820913	0.746591
	0.553185	0.704088				0.7532	0.762668
	0.732166	0.781209				0.82176	0.824796
	0.611783	0.673607				0.837662	0.783346
	0.604459	0.746048				0.818754	0.720441
	0.561783	0.714853				0.788443	0.698538
	0.533758	0.683174				0.834306	0.770821
	0.766242	0.730258				0.828394	0.80415
	0.811783	0.759514				0.772772	0.792105
	1.12452	0.826395				0.782431	0.830061
	1.35828	0.83095				0.740334	0.759118
	0.799363	0.647012				0.707057	0.739233
	0.607325	0.734137				0.826934	0.737148
	0.948726	0.714669				0.826992	0.804878
	1.16943	0.840414				0.704088	0.816022
	1.34427	0.814973				0.781209	0.735549
	0.664331	0.67977				0.840414	0.80971
	1.57771	0.768672				0.814973	0.672147
	1.51783	0.746958				0.67977	0.74619
	0.53535	0.607971				0.768672	0.800312
	1.01656	0.783521				0.746958	0.71587
	1.1379	0.747831				0.607971	0.788462
	0.635669	0.71994				0.783521	0.623364
	1.21465	0.762716				0.747831	0.840266
	0.981529	0.688838				0.71994	0.793763
	1.8758	0.904244				0.762716	0.788611
	0.942038	0.728871				0.688838	0.785643
	0.839809	0.81532				0.904244	0.867056
	1.03057	0.769778				0.728871	0.718078
	1.06115	0.810624				0.81532	0.840059
	0.811465	0.680926				0.769778	0.677566
	0.884076	0.774135				0.810624	0.799434
	0.58949	0.742842				0.680926	0.817495
	0.601911		0.696825			0.774135	0.696698
	1.02325		0.782446			0.742842	0.793731
	1.33089		0.841828			0.834081	0.699029
	0.792675		0.853355				0.750375
	1.25		0.822675			0.796708	0.741221
	0.961146		0.863486				0.747851
	0.600955		0.738209			0.784119	0.812318
	0.979936		0.833929				0.694608
	0.898408		0.816732			0.702342	0.762134
	0.797452		0.642572				0.780854
	0.669745		0.767475			0.749932	0.767662
	1.0328		0.847364				0.767565
	1.04108		0.813399			0.738969	0.809962
	0.915605		0.754783				0.834665
	0.777707		0.778051			0.891582
	0.713057		0.742742				0.794816
	0.73949		0.74031			0.803561	0.813325
	0.69586		0.695195
	0.855096	0.797393				0.693989	0.689171
	0.929299	0.795065				0.814548	0.787717
	0.797771	0.791218				0.726205	0.818089
	0.767834	0.836168					0.80633
	0.702229	0.814059					0.797995
	0.515287	0.826947					0.802296
	0.898089	0.789007					0.744008
	0.756688	0.81271					0.77193
	0.953822	0.845409					0.718842
	1.04299	0.879695					0.780125
	0.825159	0.842918					0.830022
	0.785032	0.863286					0.792163
	0.72293	0.848899					0.7939
	0.884076	0.810159					0.817493
	0.827389	0.836413					0.804656
	1.27357	0.836959					0.803922
	0.548408	0.812427					0.792011
	0.943949	0.880904					0.678335
	0.719108	0.863153					0.75913
	0.870064	0.844802					0.833578
	1.07739	0.815844					0.860307
	0.936943	0.862678					0.872639
	1.01051	0.818468					0.83064
		1.39167
	0.879299	0.825788					0.849091
	0.792357	0.811495					0.737987
	0.754777	0.85654					0.635656
	0.964331	0.778071					0.736264
	0.803185	0.741079					0.737002
	0.893312	0.855258					0.759364
	0.806688	0.800632					0.795015
	1.33312	0.883899					0.842579
	1.48981		0.809962
							0.778125
	0.797452		0.834665
							0.748903
	1.03217		0.794816
	1.06115		0.813325
	0.702866		0.689171
	0.897134		0.787717
	0.936624		0.818089
	0.845223		0.80633
	1.04841		0.797995
	0.88758		0.802296
	0.664331		0.744008
	0.88949		0.77193
	0.649045		0.718842
	0.814013		0.780125
	1.00987		0.830022
	1.20287		0.792163
	1.03376		0.7939
	1.0086		0.817493
	1.12166		0.804656
	1.03949		0.803922
	0.924841		0.792011
	0.673248		0.678335
	0.732484		0.75913
	1.30319		0.833578
	1.49554		0.860307
	1.11274		0.872639
	1.02484		0.83064
	1.59331		0.849091
	0.907962		0.737987
	0.735987		0.635656
	1.04331		0.736264
	0.735032		0.737002
	1.18185		0.759364
	0.856051		0.795015
	1.0621		0.842579
	0.815287		0.778125
	1.01592		0.748903
	0.999682		0.703727
	0.905732		0.80872
	0.710191		0.697758
	0.693631		0.701102
	1.02261		0.755839
	1.16051		0.821625
	0.872293		0.769624
	0.635032		0.766299
	1.2707	0.834081
	0.831847	0.796708
	1.02675	0.784119
	1.0742	0.702342
	1.17166	0.749932
	0.945541	0.738969
	1.49682	0.891582
	1.14459	0.803561
	0.874204	0.693989
	1.90446	0.814548
	1.03057	0.726205
