# Supplementary material for: Giant ankyrin-B mediates transduction of axon guidance and collateral branch pruning factor sema 3A
Source: eLife journal article supplement (doi:10.7554/elife.69815), 2021-11-08
Supplement: fig4-data1 [file Figure 4-source data 1.xlsx]

## Sheet: Figure 4
		Distance from most dorsal CC (μm)	Control					AnkB440 KO						Distance from top of cortex (μm)	Control				AnkB440 KO
		0	0	0.1	0.2667	0		28.4667	6.0667	5.7				0	0.2509	0	0.0072		0.0466	0.1111	0
		0.256	0	0.4667	0.1667	0		30.6333	8.4333	3.6333				4.386	0.4552	0	0.0725		0.0108	0.3584	0
		0.513	0	1.4667	0	0		30.6	11.5667	11.9				8.772	0.3907	0.0072	0.0942		0	0.1971	0
		0.769	0.2667	1.4	0.0667	0		25.7667	3.5667	11.7				13.158	0.2151	0.0797	0.0507		0.0072	0.086	0
		1.026	0.7	0.7667	0	0.6333		16.9	6.4	8.4				17.544	0.1577	0.0145	0.1522		0.1147	0.0466	0
		1.282	0.1	0.2333	0	1.9		8.6	11.5	6.2667				21.93	0.1362	0	0.2899		0.3441	0	0
		1.538	0	0.0333	0	2.0333		3.6333	19.8333	2.1333				26.316	0.0789	0	0.0797		0.233	0	0
		1.795	0	0	0	0.6		0.8	32.0667	0.0667				30.702	0.0215	0	0.0072		0.0108	0	0
		2.051	0	0	0	0.0667		0.0667	48.7	0.0333				35.088	0	0	0.029		0	0	0
		2.308	0	0	0	0		0	21.8667	12.2667				39.474	0.0036	0	0.2464		0	0	0
		2.564	0	0	0	0		0.5667	17.3667	8.7333				43.86	0	0	0.7464		0	0	0
		2.821	0	0	0	0		2.1667	12.8667	11.7667				48.246	0	0.0507	1.6739		0	0.0215	0
		3.077	0	0	0	0		4.8667	15.4333	14.0333				52.632	0.0179	0.2681	2.0942		0.0072	0.0108	0
		3.333	0	0	0	0		6.1333	24.1667	6.5333				57.018	0.0789	0.2246	1.3986		0.0108	0	0
		3.59	0	0	0	0		6.6	7.9667	7.4333				61.404	0.1362	0.1522	0.5435		0	0	0
		3.846	0	0	0	0		7.6333	1.9	6.9667				65.789	0.0789	0.087	0.1594		0	0	0
		4.103	0	0	0	0		7.5667	0.2333	10.9333				70.175	0.043	0.0725	0.1739		0	0	0
		4.359	0	0	0	0		5.6333	0	8.2667				74.561	0.0789	0.2754	0.3116		0	0	0
		4.615	0	0	0	0		3.5333	0	7.7333				78.947	0.233	0.6377	0.7609		0	0	0
		4.872	0	0	0	0		1.7	0	9.3667				83.333	0.3799	0.8841	0.8551		0	0	0
		5.128	0	0.4333	0	0		0.4	0	13.9				87.719	0.5699	0.7391	0.8188		0.0323	0	0
		5.385	0	0.9667	0	0		0.0333	0	0				92.105	0.7312	0.8043	1.2174		0.0538	0.0323	0
		5.641	0	2.0333	0	0		0	0	0				96.491	0.5125	0.7754	1.4203		0.0645	0.0538	0
		5.897	0	1.8333	0	0		0	0	0				100.877	0.2939	0.5725	1.2391		0.0215	0.0323	0
		6.154	0	0.4667	0	0		0	0	0				105.263	0.1362	0.4348	1.7319		0	0	0.3226
		6.41	0	0.0333	0	0		0.1333	0	0				109.649	0.3405	0.5507	2.7899		0	0	2.6416
		6.667	0	0	0	0		0.7	0	0				114.035	1.0717	1.0217	4.3986		0.0609	0.0108	7.0717
		6.923	0	0.0667	0	0		1.1	0	0				118.421	1.3441	2.4058	7.3333		0.0358	0.0323	12
		7.179	0	0.1	0	0		1.0333	0	0				122.807	1.1505	4.1884	10.413		0.0968	0.0896	14.7814
		7.436	0	0.3667	0	0		1.2	0.1	0				127.193	0.8674	5.5725	12.8913		0.1111	0.5161	14.6882
		7.692	0	1.1333	0	0		2.1333	0.4667	11.2667				131.579	0.6774	8.1449	14.058		0.0645	2.7778	13.5305
		7.949	0	1.7	0	0		2.7667	2.1667	4.9333				135.965	1.0717	11.5145	13.2681		0.0215	7.1864	13.5305
		8.205	0	0.8667	0	0		1.9333	8.1333	2.8333				140.351	1.2688	13.0217	10.8478		0.6631	11.6487	14.1004
		8.462	0	0.4	0	0		0.6333	17.2667	0				144.737	1.2975	14.1159	8.8116		3.5448	15.405	14.5735
		8.718	0	0.2	0	0		0.0667	34.7667	0				149.123	1.2043	15.7246	9.0217		8.7563	17.3441	14.6774
		8.974	0	0.0667	0	0		0	56.2333	0.1667				153.509	1.1183	16.471	10.7609		12.7348	18.1039	14.0538
		9.231	0	0	0	0		0	78.7	0.3667				157.895	1.086	17.0362	13.4855		14.3262	17.8172	13.6093
		9.487	0	0	0	0		0	84.6	0.3				162.281	1.4659	16.3913	15.6957		14.4014	18.2007	13.8602
		9.744	0	0	0	0		0	85	0.1667				166.667	2.491	14.3841	17.558		13.7133	18.6487	13.8602
		10	0	0	0.7	0		0	85	0.1667				171.053	3.8208	13.9058	19.2101		13.3513	19.5412	13.8638
		10.256	0	0	0.5667	0		0	85	0.2667				175.439	4.9606	15.5797	20.3551		13.3978	21.3405	14.1004
		10.513	0	0	0.1667	0		0	4.9333	0.4				179.825	5.4552	18.8623	20.3261		14.1649	21.5556	14.4194
		10.769	0	0	0	0		0	1.8333	0.5667				184.211	4.8961	21.0435	18.8696		14.8172	20.0896	14.1649
		11.026	0	0	0.3333	0		0	7.9333	0.5667				188.596	4.2724	22.413	16.3116		16.0789	17.8674	12.6272
		11.282	0	0	0.5	0		0	6.2667	1.0333				192.982	4.405	23.8768	12.6812		16.0466	16.466	10.7491
		11.538	0	0	0.1	0		0	26.7	1.3333				197.368	4.3835	26.1522	11.3188		15.2473	15.5591	9.6201
		11.795	0	0	0.2333	0		0	13.3	0.9667				201.754	4.19	27.4565	11.8623		14.8065	15.0789	8.3047
		12.051	0.1	0	0.6333	0		0	6.1333	0.5667				206.14	3.6523	25.4203	14.1884		15.1219	14.8172	6.4624
		12.308	0	0	0.1333	0		0	2.9333	0.6				210.526	3.7312	21.4275	17.8696		15.7563	14.957	4.7778
		12.564	0	0	0	0		0	1.4333	0.5333				214.912	4.2007	19.8623	18.7971		16.0681	15.147	4.1971
		12.821	0	0	0	0		0	0.6667	0.4				219.298	4.1183	22.7391	17.4565		16.5233	14.8961	4.4337
		13.077	0	0	0	0		0	2.5	0.2667				223.684	3.7778	24.4493	15.8188		16.7348	15.1828	4.3405
		13.333	0	0	0	0		0.4333	5.8	0.1333				228.07	4.2688	24.6159	14.413		17.0717	15.2832	4.0968
		13.59	0	0	0	0		1.9333	11.0667	0.0333				232.456	5.4624	26.558	13.7319		17.1254	14.4731	3.9677
		13.846	0	0	0	0		3.4667	16.3667	0				236.842	6.2222	29.6812	14.2464		17.1004	13.5161	4.7025
		14.103	0	0	0	0		6.6	20.7667	0				241.228	6.2473	32.2681	14.9783		17.5018	13.2151	5.6595
		14.359	0	0	0	0		11.9333	22.9667	0				245.614	6.4409	33.7826	14.9493		17.1792	13.3943	5.6882
		14.615	0	0	0	0		21.1	22.2667	0				250	7.3047	36.087	16.2246		16.6703	13.0036	5.0968
		14.872	0	0	0	0		31.1667	17.9333	22.9333				254.386	8.2688	37.2971	18.5507		15.8172	12.4803	4.6022
		15.128	0	0	0	0		31.3667	12.8	14.1667				258.772	8.914	36.3043	19.4275		14.853	11.9892	4.9355
		15.385	0	0	0	0		24.4	10.5	5.3333				263.158	8.7276	34.8406	19.9928		15.1111	11.724	5.2832
		15.641	0	0	0	0		12.5	11.5	7.9667				267.544	7.1183	32.7681	21.3841		15.9713	11.4409	5.509
		15.897	0	0	0	0		3.1333	15.3667	12.6				271.93	5.3871	31.0072	22.0145		15.1183	11.4086	5.491
		16.154	0	0	0	0		0.7333	19.4	18.7				276.316	4.509	29.4855	21.6159		13.448	11.9749	5.276
		16.41	0	0	0	0		0.2333	20.7667	27.6667				280.702	4.552	27.9565	18.3696		13.6237	12.8817	5.2079
		16.667	0	0	0	0.0667		0.7667	20.0667	37.5667				285.088	5.0538	26.4565	14.3406		14.509	12.3513	5.1183
		16.923	0	0	0	1.9		2.9	16.9	43.5667				289.474	5.4516	24.4565	12.9493		15.1434	11.4552	5.3513
		17.179	0	0.0667	0.1	6.4		7.0333	13	46.8				293.86	5.5412	22.3406	15		15.4444	12.0573	6.4767
		17.436	0	0.1667	0.2333	17.0667		12.8667	10.7333	47.8333				298.246	5.3584	21.8986	17.5435		15.1362	12.4122	7.3477
		17.692	0	0.0333	0.0333	32.7333		17.6333	12.2667	43.1667				302.632	5.1147	24.2826	19.1014		14.1326	11.9606	7.1004
		17.949	0	0	0	49.8333		16.9	15.8333	32				307.018	5.1505	26.9493	20.8261		14.5125	11.6953	6.6057
		18.205	0	0	0	61.6333		13.5667	24.0667	20.6333				311.404	5.4803	27.3043	22.6377		14.7993	10.4516	6.3477
		18.462	0	0	0	63.5333		14.0333	34.1667	0				315.789	5.5663	26.7536	23.1377		13.7706	8.7706	6.7419
		18.718	0	0	0	60.0333		10.5667	41.6	0				320.175	5.4301	27.9783	22.0797		13.3656	7.405	7.0968
		18.974	0	0	0	53.2		8.4333	44.8667	0				324.561	4.8996	30.0797	21.1232		13.1935	7.2294	7.0502
		19.231	0	0	0	44.2333		8.6333	44.6333	0				328.947	4.3978	30.913	20.5435		11.81	7.7491	6.9176
		19.487	0	0	0	34.1333		10.6667	41.5	0				333.333	4.2616	29.7464	18.8333		10.0036	8.3477	7.1004
		19.744	0	0	0	20.4		14.2667	37.1	0				337.719	4.6308	26.8333	17.0217		9.6559	8.9391	7.2258
		20	0	0	0	9.9		18.9333	28.4	0				342.105	5.0502	25.1014	16.6739		10.3728	9.2294	6.8495
		20.256	0	0	0	5.6		20.6	19.4333	0				346.491	5.2652	26.3406	16.6014		11.2581	8.5448	6.552
		20.513	0	0.0667	0	3.2		16.3333	13.6667	0				350.877	6.0824	29.6667	14.2246		12.7742	8.4158	6.5735
		20.769	0	0.7667	0	1.4667		9.5333	11.0667	0				355.263	6.7814	31.8986	11.9493		13.9283	8.7276	6.7133
		21.026	0	1.0333	0	0.4667		3.9	10.3333	0				359.649	7.4301	33.6739	12.5145		13.4946	9.3405	6.8387
		21.282	0	0.2	0	0.0333		2.1667	11.8333	0				364.035	7.6272	33.6159	13.4565		12.2437	10.0502	7.0609
		21.538	0	0	0.1	0		2.5333	13.8667	0				368.421	7.3297	30.5797	13.3623		10.9032	10.043	6.8961
		21.795	0	0	0.3333	0		2.6	15.6	0				372.807	6.7921	28	12.9783		10.2652	9.2581	5.7204
		22.051	0	0	0.4667	0		1.4	12.6333	0				377.193	6.276	28.4928	12.1812		10.4839	8.8208	5.1075
		22.308	0.3	0	0.6333	0		0.1667	8.1667	0				381.579	5.8495	30.2536	12.1739		11.1649	9.3477	5.319
		22.564	0.3	0	1.0667	0		0	4.9667	0				385.965	5.6308	28.7174	13.5072		11.3656	9.3405	5.6846
		22.821	0.0667	0	1.7667	0		0	3.2667	0				390.351	6.1111	26.4638	15.413		11.853	9.2186	5.7778
		23.077	0	0	1.1	0		0.6	2.1333	0				394.737	6.8387	27.1377	16.2101		13.129	8.871	5.6416
		23.333	0	0	0.4667	0		2.3	1.3	0				399.123	7.5771	29.8623	15.0072		13.7455	9.2151	5.6774
		23.59	0	0	0.3	0		4.9333	0.7	0.1				403.509	8.3692	31.2609	14.6232		13.5771	10.8065	5.6129
		23.846	0	0	0.5	0		6.5667	0.3667	1.1				407.895	9.5556	29.6594	13.9638		12.8889	12.8961	4.7527
		24.103	0	0	0.7	0		5.9333	0.4333	6.1				412.281	10.3799	26.2971	12.2464		11.9928	13.6774	3.9211
		24.359	0	0	0.6333	0		2.9333	1.2	14.0667				416.667	9.2832	25.1739	11.971		12.1864	12.7634	3.9283
		24.615	0	0	0.4667	0		0.7667	2.2	35.2667				421.053	7.3047	25.9783	12.9855		13.19	11.466	4.2437
		24.872	0.2	0	0.1667	0		0.1	1.8	54.9333				425.439	6.0036	24.1232	14.1594		13.7419	9.3513	3.5376
		25.128	2.6333	0	0.0667	0		0	0.8	66.1333				429.825	5.7348	21.7609	14.3406		13.4265	7.9498	2.6237
		25.385	7.5	0	0.0333	1.7		0	0.1667	65.9333				434.211	5.9785	21.087	13.529		12.3154	7.4265	2.1111
		25.641	14.5	0	0	5.8333		0.6333	0.1	49.8				438.596	6.2652	22	13.6159		9.767	7.0179	2.1577
		25.897	20.2667	0	0	8.7667		3.1667	0.0667	31.0333				442.982	6.4731	22.6739	13.1087		7.534	6.2258	2.8423
		26.154	20.6	0.1333	0	7.3		8.4	0	19.7				447.368	6.362	24.1594	10.5435		6.4803	6.3728	3.7491
		26.41	15.2333	2.6667	0	1.7		15.7667	0	14.6333				451.754	5.491	25.058	8		6.2401	6.6452	4.4229
		26.667	7.2333	7.5667	0	0.1		24.3667	0.2333	10.7333				456.14	5.1039	21.7971	6.7609		6.7312	7.0896	4.4767
		26.923	3.8667	17	0	0		31.5333	2.1333	8.7				460.526	5.6057	18.8768	6.8261		8.19	7.5842	4.0753
		27.179	3.6	31.7667	0	0		29.9	5.9333	9.0667				464.912	6.0502	18.2246	6.6014		9.4086	7.6487	3.6201
		27.436	2.3667	43.9333	0	0		21.3333	12.4	11.6333				469.298	6.3333	16.0652	6.7101		10.2437	7.3978	3.362
		27.692	0.8333	51.2	0	0		9.1667	21.4333	15.5667				473.684	6.7276	11.3043	7.8406		11.043	8.129	3.3047
		27.949	0.1	52.9333	0	0		2.8333	32.4333	20				478.07	7.5986	9.1594	9.2464		11.5842	9.1505	3.448
		28.205	0	50.1333	0	0		0.6667	38.4333	21.4667				482.456	8.0179	10.5	8.8623		11.0932	9.957	3.7993
		28.462	0	35.5667	0	0		0.0667	35.7667	18.1667				486.842	7.5771	12.6957	7.7246		11.0645	10.2903	4.2473
		28.718	0	18.8	0	0		0	25.5	15.7				491.228	7.2975	12.3696	7.3841		12.147	10.5448	3.9498
		28.974	0	7.2	0	0		0	14.4	19.8333				495.614	6.9928	10.5217	6.6812		12.4767	9.9713	3.3118
		29.231	0	1.7667	0	0		0	5.2	29.5667				500	6.7419	9.2246	5.3261		11.1004	8.957	3.0717
		29.487	0	3.4	0	0		0	1.0333	42.1333				504.386	6.853	7.5362	4.6884		9.0215	7.8459	3.1111
		29.744	0	9.6667	0	0		0	0.1667	51.4667				508.772	6.7885	6.3261	4.7174		8.6631	7.8208	3.2832
		30	0	18.4667	0	0		0	0	50.1				513.158	5.4624	7.2319	5.1159		9.233	7.9319	3.7563
		30.256	0	25.0667	0	0		0	0.0333	38.5333				517.544	3.6667	8.6304	4.587		8.8387	7.6452	4.0824
		30.513	0	23.5333	0	0		1.5	0.0333	28.7				521.93	2.8065	8.0725	3.5507		8.5018	7.8423	4.0932
		30.769	0	18.6	0	0		7.9	0.0333	34.5667				526.316	2.6953	5.5942	3.471		8.4373	8.595	4.043
		31.026	0	10.2667	0	0		17.9	0	46.6				530.702	3.0968	3.9565	3.4783		8.233	8.4516	4.2616
		31.282	0	3.8	0	0		30.9333	0	60.7333				535.088	3.5054	3.0217	3.2464		7.4875	7.8996	4.2473
		31.538	0	0.4	0	0		40.0333	0	74.3				539.474	3.4337	2.3406	2.9275		7.0215	7.233	4.1971
		31.795	0	0	0.0667	0		44.0333	0	82.5667				543.86	3.3799	3.058	1.9928		6.6738	6.8315	4.5556
		32.051	0	0	1.0333	0		46.0333	0.6667	84.8				548.246	3.0538	3.8986	1.1812		7.1541	6.7706	5.2079
		32.308	0	0	3.6333	0		42.6667	32.308	85				552.632	2.6237	3.4783	1.0362		7.3763	6.8351	6.5448
		32.564	0	0.2333	10.5667	0		33.0667	32.564	85				557.018	2.2366	2.3333	0.9348		7.8315	6.1219	8.2222
		32.821	0	1.5667	11.0667	0		21.7333	32.821	85				561.404	1.9247	1.6014	0.8478		7.3656	4.7634	9.3333
		33.077	0	3.5667	7.2667	0		33.1	33.077	84.9333				565.789	1.7599	1.3551	0.8261		6.9857	3.3154	8.828
		33.333	0	9.2	8.6333	0		36.5667	33.333	81.9333				570.175	1.7921	1.7609	0.6812		7.1505	2.6416	7.7814
		33.59	0.8	15.5667	16.0333	0		32.7333	33.333	70.2				574.561	2.0143	1.8043	0.7464		7.0394	3.0609	7.1004
		33.846	4.0667	18.9	16.3667	0		24.4667	33.59	52.9667				578.947	2.1971	1.3986	1.1159		7.1326	3.405	6.6272
		34.103	8.4667	22.6667	12.6	0		35.3333	33.846	34.2333				583.333	2.147	1.1522	1.1812		7.1935	3.276	6.1326
		34.359	14.6333	17.3333	3.9667	0		39.7667	34.103	30.6				587.719	2.1004	0.6884	0.9348		7.4982	3.7133	6.4014
		34.615	12.0667	12.1	1.2	0		39.5	34.359	35.1667				592.105	1.8961	0.3768	0.8551		8.0394	3.7563	7.3907
		34.872	14.3	9.2333	0.3	0		36.4667	34.615	34.0333				596.491	1.6523	0.4058	0.6087		7.9391	2.8387	8.4194
		35.128	14.0667	11	0.0333	0		29.5	34.872	32.9333				600.877	1.5556	1.0362	0.4493		8.0538	3.0036	9.0323
		35.385	11.2667	7.7667	0	0		19.3333	35.128	34.4				605.263	1.2796	0.7681	0.2971		8.0143	3.6237	8.9498
		35.641	7.7	1.3	0	0		11.8	35.385	28.7				609.649	1.0287	0.9928	0.2536		6.3728	3.7921	9
		35.897	6.7333	0.0667	0	0		7.2333	35.641	18.2333				614.035	1.2007	1.7319	0.3406		5.1792	3.6452	9.4695
		36.154	3.7667	0	0	0		3.9	35.897	6.3667				618.421	1.5556	1.913	0.6449		6.2043	3.7706	9.8781
		36.41	2.3333	0.1	0.0333	0		2	36.154	1.4				622.807	1.7455	1.4638	0.6304		6.5699	3.6452	9.5735
		36.667	13.4667	0.2	0	0		0.4333	36.41	0				627.193	1.6272	1.0797	0.5145		5.81	3.2079	8.914
		36.923	9.6	0.0333	0	0		0	36.667	0				631.579	1.3513	1.2246	0.3551		5.1111	2.9821	8.8423
		37.179	3.2333	0	0	0		0	36.923	0				635.965	1.3763	1.6232	0.2029		5.1183	2.7204	9.0932
		37.436	1.5333	0	0.1333	0		0	37.179	0.0333				640.351	2.0251	1.5652	0.3116		5.5161	2.7276	9.7348
		37.692	1.6333	0	2.5667	0		0	37.436	0.1667				644.737	2.1792	1.3333	0.4638		5.8459	3.0645	11.1147
		37.949	9.0667	0	7.0333	0		0	37.692	0.7				649.123	2.147	0.8841	0.3623		5.5591	3.3082	13.3548
		38.205	4.5333	0	14.4667	0		0	37.949	2.8333				653.509	2.0036	0.5362	0.3261		5.0789	3.8351	15.1254
		38.462	8.5	0	7.5333	0		0	38.205	7.6667				657.895	1.6882	0.7899	0.5072		5.2007	4.0108	15.7849
		38.718	11.9	0	11.7333	0		0	38.462	16.0333				662.281	1.4982	1.1087	0.4783		4.9032	4.466	15.7204
		38.974	14.4333	0.2	13.8333	0		0	38.718	28				666.667	1.4158	1.5435	0.3841		4.8244	5.1111	15.7849
		39.231	15.3333	0.6333	9.9	0		0.0667	38.974	40.9667				671.053	1.2975	2.5072	0.3623		4.3907	6.1505	15.3584
		39.487	18.1	0.2667	11.5	0		4.5667	39.231	47.3				675.439	1.1004	3.1594	0.4855		4.1147	6.9427	14.2115
		39.744	23.7333	0	29.9	0		22.0333	39.487	50.0667				679.825	1.0466	3.5942	0.5652		5.1971	6.8244	13.0466
		40	22.8	0	26.9667	0		40.8	39.744	50.2333				684.211	1.3513	4.4348	0.4928		7.2437	6.3978	12.5197
		40.256	27.6	0	51.4667	0		49.6	40.256	45.2				688.596	1.8566	5.3913	0.7029		8.3441	6.1864	12.7849
		40.513	27.9	0	43.4667	0		48.7333	40.513	29.7				692.982	2.0789	5.2754	1.2464		7.7204	6.7957	13.767
		40.769	34.0333	0	34.7667	0		41.1667	40.769	22.6				697.368	1.9211	4.1594	1.3913		7.172	7.5018	13.7384
		41.026	42.8	0.1333	27.4	0		27.5667	41.026	24.8				701.754	1.6237	3.8913	1.2319		7.6452	8.086	13.276
		41.282	54.6333	0.0333	22	0		14.6667	41.282	25				706.14	1.4552	5.529	1		8.9677	9.2294	13.2545
		41.538	56.3333	0	17.9667	0		26.0667	41.538	27.8667				710.526	1.1649	6.9855	0.8913		9.2186	11.1649	13.4229
		41.795	49.3333	0	12.5	0		21.8333	41.795	11.2333				714.912	1.0215	7.1739	0.8986		8.362	12.8351	13.0466
		42.051	39.5	0	5.7667	0		20.5	42.051	17.9667				719.298	1.1039	6.9783	0.8623		7.957	11.7527	13.1183
		42.308	27.3	0.1	1.6	0		21.5	42.308	30.2333				723.684	1.4301	7.3406	0.9348		7.1434	10.2079	13.8746
		42.564	22.8667	0.0333	0.4	0.0667		28.6	42.564	47.3667				728.07	1.8065	7.8986	1.4058		7.0502	9.5986	13.8423
		42.821	23.3	0	0.1667	0.4667		30.6	42.821	65.9				732.456	1.9964	8.2609	1.7029		7.1613	8.9176	12.6667
		43.077	21.7	0	0.0333	0.7667		66.5	43.077	74.4667				736.842	1.9606	9.2029	1.9638		7.2043	8.7455	12.0108
		43.333	17.1	0	0	0.1667		82.9667	43.333	73.5667				741.228	2.0072	10.5	2.6812		8.0143	9.9427	12.0036
		43.59	10.9	0.6667	0	0		85	43.59	67.2667				745.614	2.2043	9.8116	3.2174		8.4552	11.2294	11.9713
		43.846	4.4667	1.2333	0	0		85	43.846	53.7667				750	2.9749	8.1304	3.0362		8.086	13.1075	12.0896
		44.103	1	0.4667	0	0		83.9667	44.103	36.4333				754.386	4.1219	6.9638	2.7391		8.9427	13.6846	12.0358
		44.359	0.1	0.0333	0	0		72.6333	44.359	20.5667				758.772	4.5663	7.5652	2.2826		10.3871	13.6237	11.7491
		44.615	0	0.2667	0	0		48.8667	44.615	21.1667				763.158	4.595	8.4855	2.2029		11.2688	14.2903	11.5806
		44.872	0	0.1667	0	0		27.5333	44.872	26.0333				767.544	4.8781	8.4638	3.029		10.5197	14.0394	11.3584
		45.128	0	0	0.2	0		15.7333	45.128	24				771.93	5.3333	8.3116	3.9855		8.6953	14.3871	10.7419
		45.385	0	0	0.2	0		12.5667	45.385	26.5667				776.316	5.4265	8.5217	4		8.7957	15.724	9.6308
		45.641	0	0	0.0333	0		18.6	45.641	21.2667				780.702	5.2652	8.9058	3.5072		9.4588	14.4373	9.3333
		45.897	0	0	0	0.2333		30.4	63.0333	28.8333				785.088	5.6631	10.0362	3.6594		10.3369	12.0072	9.2115
		46.154	0	0	0	1.8333		48.4333	67.3333	24.9333				789.474	6.5663	11.3478	3.9638		12.3477	10.172	8.7885
		46.41	0	0	0.1333	4.9667		61.4667	71.7333	24.4667				793.86	7.7814	12.4783	4.1304		12.6882	9.8889	9.2079
		46.667	0	0	1.5333	7		62.9	75.0333	24.1333				798.246	7.9677	14	4.8261		11.4624	9.1792	10.0645
		46.923	0	0	2.7	4		55.5667	76.5	31				802.632	7.4875	16.2101	5.5507		10.957	9.2616	9.7384
		47.179	0	0	2.2	5.3667		43.5	77.3	42.1				807.018	7.0717	17.9493	6.3116		12.0215	11.1254	8.8638
		47.436	0	0.0667	1.0667	12.5		31.8	72.0667	37.9667				811.404	6.8387	19.6014	6.6159		13.7921	12.2401	8.6487
		47.692	0	0.2333	0.1333	15.8667		32.3667	57.1333	24.1333				815.789	7.2867	20.529	6.6812		15.0896	11.6237	8.2473
		47.949	0	0.6	0.0667	12.5667		20.8667	46.2333	23.9333				820.175	8.2724	20.9275	6.3623		15.1362	11.8674	8.086
		48.205	0	1.5333	0	9.8		26.7	46.6667	39.0333				824.561	8.9211	22.058	6.6594		14.4444	12.8172	8.5591
		48.462	0	2.3333	0	7.7		40.3333	56.1	37.6				828.947	8.4767	24.029	8.1159		13.1111	13.3441	9.2294
		48.718	0.0667	2.2	0	9.3667		56.0667	63.9667	37.8667				833.333	8.1935	26.6449	8.9348		12.957	13.7097	9.0753
		48.974	0	1	0	13.5333		62.8	64.6	35.7				837.719	9.0108	29.5652	8.7754		12.7097	15.0681	8.9104
		49.231	0	0.1333	0	18.1333		63.4667	61.7333	35.1				842.105	10.6201	30.8188	7.6667		11.0502	16.0358	9.0287
		49.487	0	0	0	16.6667		61.2333	56.4667	35.6				846.491	12	30.3406	7.1232		10.3333	15.8351	8.6738
		49.744	0	0	0	10.3		56.6667	51.6667	39.2333				850.877	12.1971	28.4855	6.9348		11.3692	17.3799	7.8638
		50	0	0	0	3.7		61.5333	50	24.7333				855.263	11.9785	27.6884	7.3478		13.1685	19.6846	7.5556
		50.256	0	0	0	0.3667		69.3	50.256	20.4667				859.649	12.466	29.3406	7.913		14.0287	20.3907	7.8781
		50.513	0	0	0	0		72.1667	50.513	29.4				864.035	12.9606	30.8406	7.8478		14.2401	19.7204	8.1577
		50.769	0	0	0	0		74.5	50.769	31.2667				868.421	14.7025	31.8986	8.2174		15.4946	19.3297	7.8817
		51.026	0.3	0	0	0		75.1	51.026	34.3667				872.807	17.1649	33.1014	9.7609		15.9677	19.6057	8.1541
		51.282	2.7	0	0	0		76.1667	51.282	33.1333				877.193	18.3799	33.4275	11.1884		15.3978	19.7061	8.6595
		51.538	3.8667	0	0	0		80.5333	51.538	37.7667				881.579	17.6846	32.0217	10.9203		15.1398	20.7455	8.5197
		51.795	4.4	0	0	0		80.3667	51.795	17.1				885.965	16.6487	29.0652	10.5217		15.9176	21.5376	7.8172
		52.051	2.4	0	0	0		74.3667	52.051	33.5333				890.351	16.3513	26.8841	10.7826		16.5627	22.9857	7.3799
		52.308	0.3333	0	0	0		66.7333	52.308	46.2667				894.737	16.8459	26.6304	10.6957		17.4839	25.0358	7.4767
		52.564	0	0	0	0		70.6	52.564	48.8				899.123	16.767	27.5725	10.6304		17.1613	24.3799	7.8566
		52.821	0	0	0	0.1667		79.1333	52.821	44.2333				903.509	18.0896	28.4058	11.6667		16.2473	21.7168	7.9319
		53.077	0	0	0	1.8333		83.2333	53.077	39.1667				907.895	20.2616	28.1232	13.4855		17.2258	19.4516	7.5699
		53.333	0	0	0	1.9		84.7333	53.333	43.4				912.281	21.0143	27.9565	13.9928		18.7133	19.1649	6.8244
		53.59	0	0	0	2.8333		85	53.59	70.4667				916.667	20.6846	27.1014	13.2029		18.9427	18.6595	6.2939
		53.846	0	0	0.9	1.6		85	53.846	75.2667				921.053	21.3656	24.1449	13.6377		17.6093	18.1649	6.4014
		54.103	0.0333	0	2.3667	3.0667		84.9333	54.103	72.5667				925.439	24.638	19.2029	15.029		16.9713	16.0896	7.0538
		54.359	0.1333	0	1.5	6.4333		84.8	54.359	61.5				929.825	26.3835	14.7101	15.4638		15.7993	13.6272	7.828
		54.615	0	0	0.5333	10.3		83	54.615	36.2				934.211	25.172	12.6087	16.3913		13.9498	14.1505	8.5986
		54.872	0	0	0.0667	10.1667		69.4	54.872	19.5667				938.596	23.3011	12.4348	17.7826		12.595	16.8136	8.7348
		55.128	0	0	0	10.5		45.4	55.128	28.3667				942.982	22.5484	12.7536	17.2826		12.2975	18.9283	8.5197
		55.385	0.3	0	0.1	12.9667		29.3	55.385	24.6				947.368	21.2079	13.1957	16.2899		13.7168	19.2473	8.3728
		55.641	2.5333	0	0.0667	10.2333		17.8333	55.641	36.7333				951.754	19.9642	12.8841	15.8696		15.3728	18.2079	8.4516
		55.897	8.8333	2	0	16.6333		24.5667	55.897	23.1667				956.14	19.509	12.1014	15.8261		16.0932	17.8746	8.5735
		56.154	17.9333	0	0	21.2		29.3667	56.154	28.6333				960.526	18.9785	11.2536	15.7391		15.2401	18.2581	8.9749
		56.41	28.9667	0	0	25.0667		29.4	56.41	32.0333				964.912	18.5627	11.0942	15.0797		13.9964	17.1111	9.4624
		56.667	37.1667	0	0	70.9667		23.0667	56.667	47.8				969.298	18.19	10.8696	14.2101		13.9462	15.9498	9.3871
		56.923	43.4	0	0	64.3		41.4667	69.2333	61.5				973.684	17.7097	9.2681	15.6449		13.3226	15.8996	8.9928
		57.179	48.2	0	0	73.3		55.4333	81.5667	64.5				978.07	17.7778	7.9493	17.058		12.9642	15.8244	8.8925
		57.436	56.7	0	0	81.5333		62.9333	84.7667	65.7667				982.456	17.2616	7.0362	17.0507		12.4194	15.2366	8.4731
		57.692	66.5	0	0	84.3		65.5	85	56.5				986.842	15.1326	5.6884	15.8406		12.2258	13.6022	8.2043
		57.949	72.2333	0	0	84.9333		59.7	85	46.6667				991.228	12.853	4.5942	14.3696		13.3799	13.276	8.595
		58.205	69.4	0	0	85		46.0667	84.9	32.3667				995.614	12.2258	4.7826	13.4493		14.2151	12.7061	9.2258
		58.462	49	0	0	84.9		34.7	78.9333	28.0333				1000	13.0932	5.0072	12.7826		13.2473	10.871	9.0789
		58.718	26.5667	0	0	84.6		24.9333	66.0333	36.8				1004.39	13.1935	4.5942	11.6522		11.8244	9.9391	8.5125
		58.974	10.9667	0	0	83.8		16.0667	52.9667	47.4				1008.77	12.3943	3.7681	10.6232		11.362	9.5054	8.1362
		59.231	6.4333	0.0333	0	79.1333		11.9333	42.7	59.3				1013.16	12.5986	3.8333	10.9855		10.1398	9.7527	8.8853
		59.487	3.6667	0	0	65.4333		14.2333	34.8667	62.2				1017.54	12.8351	4.1159	10.2101		10.1362	10.5412	10.1254
		59.744	1.5333	0	0	44.4667		31.2333	34.9333	49.4667				1021.93	11.4301	4.6739	8.7826		10.3584	11.0287	10.7563
		60	0.2	0	0	24.3333		55.7333	42.6	28.9				1026.32	9.3978	5.7609	8.0507		10.4086	11.2186	11.1685
		60.256	0	0	0	15.1333		67.4333	56.7333	18.8333				1030.7	7.2115	5.6159	7.5072		11.0896	11.4875	11.7491
		60.513	0	0	0	14.3667		61.6	72.2	23.1				1035.09	5.8889	4.0072	6.587		11.6344	11.6272	12.3297
		60.769	0	0.3	0	17.0333		51.6667	83.1333	37.7				1039.47	6.2401	2.3116	5.4275		11.5842	12.9068	12.5771
		61.026	0	1.8	0.4	24.6333		65.6	85	56.7				1043.86	6.595	1.9493	4.7899		11.3656	13.6272	12.3692
		61.282	0	4.3333	0.5	34.9		77.9	84.2	68				1048.25	6.9462	1.9638	5.0217		11.3513	12.9821	12.6129
		61.538	0	7.2333	0.0667	45.8333		82.7333	82.1667	66.6667				1052.63	7.6416	1.8696	5.1884		12.1183	12.5054	13.7455
		61.795	0	7.0667	0	51.4667		83.0667	79.3	64.1333				1057.02	8.8065	1.6522	4.7391		12.8674	13.2724	14.4444
		62.051	0	5.2333	0	59		77.2	73.8333	59.2333				1061.4	9.3763	1.4783	5.4928		11.9391	13.9104	14.7599
		62.308	0.0667	4.3667	0	70.9667		64.6	64.8	51.9				1065.79	8.7455	1.1087	5.9638		11.3154	13.9892	15.2616
		62.564	0.1667	22.4	0	82.0667		52.2333	62.564	51.0333				1070.17	7.8638	1.2609	5.2174		12.7778	13.3477	15.3978
		62.821	0.9	1.8	0	84.7333		47.4	62.821	53.4667				1074.56	7.1541	2.2246	4.8841		14.405	11.1505	16.2581
		63.077	3.3333	2.8	0	83.8		40.5667	63.077	55.0333				1078.95	6.9677	4.2029	4.1957		15.0466	9.9785	17.7276
		63.333	8.1667	2.8	0.1	78.0667		31.7	63.333	51.9333				1083.33	7.4373	5.2899	3.6667		15.9355	9.8351	17.3728
		63.59	19	3.3	0.2	72.1		31.0333	63.59	44.9667				1087.72	8.3154	4.2319	3.1812		15.1864	10.2151	15.3513
		63.846	33.2667	4.3667	0.1667	69.8667		34.2667	63.846	33.3				1092.11	8.4552	3.2609	2.3188		13.086	10.1649	14.9032
		64.103	45.3667	5.9333	0.8667	68.7333		36.4	64.103	24.1				1096.49	7.7849	3.2899	1.6377		10.9391	10.491	16.2258
		64.359	54.8	6.9333	4.4667	67.2		24.8667	64.359	22.9667				1100.88	7.3333	4.3333	1.5507		9.8746	10.4731	17.509
		64.615	64.7667	4.7	10.7667	64.3		19.4	64.615	29				1105.26	6.5914	4.7826	1.8261		9.9391	10.0896	18.4444
		64.872	72.0667	1.7	17.8333	61.9		20.9333	64.872	42.2333				1109.65	5.8889	4.4203	2.413		11.1362	9.7814	19.1756
		65.128	76.0667	0.4667	21.3333	56.9667		23.4	65.128	58.1667				1114.04	5.957	4.2971	2.8696		11.7706	10.2151
		65.385	78	3.1333	22.1667	52.7333		26.4	65.385	74				1118.42	6.0072	4.8478	3.2536		12.172	11.2509
		65.641	65.0333	8.2667	12.1667	59.5		30.8333	65.641	82.3				1122.81	5.9247	6.1667	2.7899		12.3154	12.0538
		65.897	43.7333	9.2667	3.8333	70.7333		36.0333	65.897	80.4333				1127.19	6.0179	8.0435	2.587		12.3835	12.0681
		66.154	25.7333	9.5	0.4667	77.5		36.6333	66.154	72.4667				1131.58	6.2975	8.2609	2.3696		11.9355	11.4552
		66.41	13.4	7.9	0	81.2667		36	66.41	70.7				1135.96	6.3441	8.6159	2.2536		10.7742	10.2079
		66.667	7.3333	5	0.2	81.7667		25.1333	66.667	72.2333				1140.35	6.5663	9.1522	2.587		9.552	9.0573
		66.923	3.3	2.2333	0.8667	79.6		23.6333	66.923	76.0667				1144.74	6.8853	8.2174	2.5072		9.2151	8.7885
		67.179	1.0667	0.4	1.5667	61.5667		29.2333	67.179	76.5333				1149.12	7.0036	6.8043	2.7826		8.4982	8.8315
		67.436	0.1667	0	3.0333	40.7		34.7	67.436	70.1				1153.51	7.3297	6.1522	2.7391		8.914	8.9642
		67.692	0	0	4.3333	24.8		30.8333	67.692	59.3				1157.89	7.4194	5.0362	2.6812		10.9785	10.5233
		67.949	0	0.2333	2.4667	14.5667		23.6667	67.949	43.5667				1162.28	7.1577	4.9565	3.1957		12.6201	12.3871
		68.205	0	0.6333	0.6667	8		15.9	68.205	27.9333				1166.67	6.7957	6.3696	3.2681		13.6093	14.2007
		68.462	0.0667	0.4	0.0667	4.5333		14.8667	68.462	16.3667				1171.05	7.0502	7.7754	3.087		13.0968	14.5735
		68.718	0.0333	0.4667	0	3.6667		16.6333	68.718	9.9333				1175.44	7.5376	6.442	3.5797		13.0143	14.2079
		68.974	0.0333	1.9	0	4.5		25.5667	68.974	16.8				1179.83	7.3584	3.913	4.2681		13.1183	14.448
		69.231	0.0333	4.8	0	4.5		34.7	69.231	16.4333				1184.21	7.0108	3.1304	4.2174		13.7455	14.2939
		69.487	0	6.8	0	3.0667		41.1333	69.487	25.1				1188.6	6.9355	3.6884	3.6159		14.0896	13.7419
		69.744	0	7.9	0.5333	2.9333		38.5333	69.744	23.7				1192.98	6.9391	5.442	2.8478		14.8674	12.6989
		70	0	9.6667	2.2667	7.5667		39.4667	70	23.0333				1197.37	6.7097	6.3406	2.3116		16.0824	12.6846
		70.256	0	11.9667	2.5667	17.7333		40.7	70.256	23.4				1201.75	6.5125	5.7246	1.8478		17.405	13.1183
		70.513	0	12.4667	1.4667	31.6667		51.2333	70.513	25.3667				1206.14	6.2401	5.8043	1.7101		17.0609	13.0072
		70.769	0	9.8667	0.8	43.8667		59.6333	70.769	29.7667				1210.53	5.9498	7.2536	2.2464		16.0179	12.7384
		71.026	0	6.1	1.5667	48.7667		66.6333	71.026	26.4667				1214.91	6.147	7.8696	2.9058		15.19	12.1792
		71.282	0	2.3333	4.0667	41.5667		70.6667	71.282	33.8333				1219.3	6.2867	7.8913	2.8551		14.6308	12.086
		71.538	0	0.5	7.5333	22.6333		72.7667	71.538	30.2				1223.68	5.8817	8.1739	2.5507		15.2616	11.4516
		71.795	0	1.6	9.3	10.0333		77.2	71.795	34.8333				1228.07	4.9749	8.6739	2.8261		16.7419	11.1075
		72.051	0.5667	4.3667	6.8667	10.7667		82.7667	72.051	41.2				1232.46	4.595	8.3333	2.3768		17.534	11.0394
		72.308	2.3667	8.3	2.1	13.4333		81.5667	72.308	47.6667				1236.84	4.8602	6.5145	1.7319		16.0824	11.5233
		72.564	7.1667	8.6333	0.2333	18.3		76.8333	72.564	53.7				1241.23	5.4444	5.8696	1.4565		13.9068	11.5842
		72.821	12.1667	5.2333	0	29.0667		71.9667	72.821	62.5333				1245.61	5.853	7.4638	1.4928		12.0789	12.0251
		73.077	17.2	21.7333	0	44.1667		68.0333	70.6667	74.6667				1250	5.9462	9.5	1.4348		12.6093	12.9247
		73.333	20.8667	31.1667	0	62.6333		66.3667	75.1	82.1				1254.39	6.3047	10.8406	1.4565		14.5448	11.4194
		73.59	23.5333	20.5333	0.0333	73.9		67.3333	77.8667	84.4667				1258.77	6.8387	10.3696	0.971		16.0896	10.2473
		73.846	31.2	0.0667	23	79.8333		71.0333	80.7	84.9667				1263.16	7.5448	9.0725	0.7174		17.3262	10.2652
		74.103	44.4	0.0333	25.76	83		70.3333	83.4667	85				1267.54	7.8817	7.2899	0.6739		17.129	10.4767
		74.359	57.5667	50.3333	30	84.3333		69.7333	84.6667	85				1271.93	7.8566	6.0725	0.5942		15.2115	11.9355
		74.615	65.9333	32.6333	31.87	84.3667		67.0667	83.2333	85				1276.32	8.319	5.8986	0.8986		14.2043	13.9283
		74.872	72.5	50.6667	60	83		63.7333	80.5	85				1280.7	8.7061	7.2101	1.2246		14.4946	15.0609
		75.128	64.3	53.3333	56.7	80.5		53.7	79.3333	85				1285.09	8.9247	8.1812	1.7464		16.7491	15.4444
		75.385	58.1	60.0333	40	69.3333		42.2667	81	85				1289.47	8.7276	7.6884	2.4203		19.0609	14.9821
		75.641	60.9333	67.8	34.98	58.0667		35.1	83.5	85				1293.86	7.7563	6.9928	3.1957		18.914	15.19
		75.897	69.1	43.6	40.5	49.8333		27.5	84.8333	85				1298.25	6.9068	7.4058	4.1159		17.724	17.4695
		76.154	75.5	34.5	52.3333	48.6333		17.2333	85	84.9667				1302.63	6.5484	8.3188	3.9783		16.8566	19.9713
		76.41	79.6333	60.3	64.9667	61.5333		11.7333	85	85				1307.02	6.7921	9.8116	3.058		19.0573	19.6237
		76.667	77.4667	55.4	8.0333	76.1667		14.3667	85	84.9667				1311.4	7.8961	11.4058	2.1667		22.1505	18.5018
		76.923	70.5667	35.3667	30.9	80.2		18.3333	85	82.6333				1315.79	8.4158	11.7899	2.1449		24.4803	18.1183
		77.179	66.2	28.9	14.6	72.1333		21.1333	85	78.1				1320.17	8.3907	11.2101	2.529		25.3262	19.4337
		77.436	62.7667	48.8333	20.8333	54.4333		17.2	83.4333	69.2667				1324.56	8.4409	11.8623	2.7101		26.2437	21.8387
		77.692	55.6	54.2667	29.8667	46.5333		21.2	76.2333	56.6333				1328.95	9.3656	14.2826	3.1957		27.4875	23.1935
		77.949	35.3667	50.6	41.1333	48.6667		30.2	62.7333	44.4667				1333.33	10.3405	15.8913	4.0435		29.4624	23.5591
		78.205	21.3	41.8667	59	50.9333		34.9667	43.5	42.1667				1337.72	10.5161	16.1087	4		31.0609	25.5806
		78.462	14.7667	39.3	71.4333	63.3333		46.6	25.1	43.4333				1342.11	10.2294	16.1232	2.471		30.3692	27.6237
		78.718	15.4333	47.9333	81.0667	67.5667		61.2333	13.9333	35.7				1346.49	10.4624	17.529	1.3406		28.0143	27.3513
		78.974	23.8333	53.5667	81.7	59.7667		65.9	8.4667	26.4				1350.88	11.1685	19.5435	1.0362		26.9606	25.6344
		79.231	41.6333	62.2333	79.4	42.4333		68.6667	8.5333	17.9				1355.26	11.767	18.3116	1.0942		27.7276	24.4552
		79.487	59.6667	74.5	78.2667	45.5333		71.3	15.1	24.7667				1359.65	12.0789	18.0145	1.3841		28.4265	23.6989
		79.744	70.8	77.6	73.3	58.5333		67.0667	25.5333	37				1364.04	12.043	21.6594	2.1304		28.534	23.1147
		80	76.2	68.4333	61.6333	57.1667		59.2333	35.2333	46.5667				1368.42	11.6882	27.8261	3.0145		27.8781	23.0932
		80.256	79.2	44.4667	49.2333	53.9667		55.9	31.8333	45.1333
		80.513	81.2	27.2667	33.1	42.8		50.8667	19.9667	34.3667
		80.769	81.0667	19.8667	35.4667	33.4		41.1	10.7667	19.4667
		81.026	73.3667	16.5667	6.1	15.2333		31.8333	6.6667	8.1333
		81.282	60.8667	17.5333	3.3	19.2		24.4	25.7	22.5
		81.538	64.0667	26.8	4.2333	22.7667		25.4	26.8667	20.6667
		81.795	76.2333	47.4	6.6667	21.9667		22.2333	28.1667	18.0667
		82.051	83.4333	66.6	10.9667	19.0667		18.8	29.5333	12
		82.308	84.6667	69.8	16.9667	15.2667		17.8333	12.6333	20.0333
		82.564	77.2667	68.7333	32.3333	9.6667		15.1	20.3333	0.2667
		82.821	64.1667	74.6333	49.3	3.4333		17.8333	31.0333	10.6
		83.077	53.8333	79.7667	65.0667	0.4333		27.5667	41	11.9
		83.333	49.8	83.6667	77.9333	0		34	39.5	24.1667
		83.59	52.9333	84.8667	84.1667	0		35.8	32.2333	27.5667
		83.846	58.4	85	85	0.0333		32.7667	28.3	16.4333
		84.103	59.1667	84.8667	85	0		28.1	37.5	31.8667
		84.359	54.9667	83.9333	85	0		23.5333	46.1	52.1667
		84.615	40.4333	80.9	85	0		20.6667	47.5333	65.3333
		84.872	36.6333	74.5667	85	0		14.4	41.9667	61.1333
		85.128	51.8333	63	84.1333	0		7.6333	28.5	46.1667
		85.385	70	44.1667	81.0667	0		3.2333	16.9	30.2667
		85.641	80.6333	30	66.0333	0		1.9333	11.9667	25
		85.897	84.3	22.8	41.9	0		2.8	8.2	26.2
		86.154	84.7667	19.8667	30.8	0		5.9333	4.2	34.4333
		86.41	83.6667	17.6333	30.6667	0		11.2333	2.7667	48.9
		86.667	81.9333	16.5	33.3667	0		18.6333	5.3	64.2667
		86.923	78.4667	19.4333	29.0333	0		27.6667	10.0667	72.8
		87.179	70	21.4667	22.7	0		32.3333	18.8	76.8667
		87.436	57.8667	20.6333	24.2333	0		27.5	25.6667	80.5667
		87.692	49.3	20.3	33.6	0		18.8667	28.7667	82.0667
		87.949	40.2	24.1333	52.0667	0		13.9667	24.3	82.5
		88.205	31.4333	32.8333	70.1	0		13.5	17.7	82.6667
		88.462	26.0333	43.7667	76.5	0		18.4	17.4667	83.8667
		88.718	27.3	53.0667	72.1667	0		25.7333	22.4333	84.8333
		88.974	33.6667	63.7	58.3	0		29.3333	35.9667	85
		89.231	35.0333	65.2	49.4333	0		24.4	50.9667	85
		89.487	23.6667	50.2	39.6	0		15.3	57.6333	84.8333
		89.744	13.2	39.9667	23.9667	0		10.5667	58.9667	82.2
		90	7.4667	34.9667	14.3667	0		10.4333	57.7667	76.5333
		90.256	4.4333	31.0333	11.4667	0		12.5333	57.4667	66.8
		90.513	4.3	25.1333	13.5	0		15.6	61.8333	56.6667
		90.769	6.2333	19.8	18.7	0		16.9667	65.2667	50.9667
		91.026	9.2	19.1667	24.3333	0		17.2	67.5333	43.3
		91.282	17.4	21.4	34.6	0		16.6	67.9667	33.1
		91.538	25.4333	27.5667	49.4333	0		15.3	66.7667	25.8667
		91.795	33.9	28.6667	59.1	0		17.5	65.3	24.0333
		92.051	36.3	22.8667	60.5333	0		22.6	69.0333	26.7667
		92.308	37.7667	14.7333	58.1333	0		32.6333	72.4333	34.5667
		92.564	29.2667	10.6333	48.4667	0		43.7333	75.7	44.3
		92.821	17.7667	7.5	35.7667	0		52.1667	75.6	53.1333
		93.077	12.8	4.5333	23.8	0.0667		50	66.1	58.0333
		93.333	16.5	3	14.3667	2.0667		42.3667	48.4	61.4
		93.59	21.3333	1.8667	10.2333	5.4667		33.2	32.0333	63.4667
		93.846	27.3	1.0667	11.3333	8.5333		24.7667	24.8	68.7
		94.103	27.6	1.3	16.2333	10.0333		18.8333	28.5	63.8333
		94.359	27.1	2.4667	23.1	7.4333		18.2667	37.2	52
		94.615	30.7	7.4667	36.3	3.5667		21.2	41.9667	41.3667
		94.872	36.1333	14.2333	46.1667	1.5333		24.2	40.6	31.3667
		95.128	38.2333	25.2667	52.8	1.9667		26.8	33.3	24.9667
		95.385	35.7333	41.8667	63.7333	6.1667		27.6333	21.1333	26.6333
		95.641	32.9	55.7333	76.6	16.6333		33.4333	13	30.6667
		95.897	27.3	58.4	83.7333	27.1		41.5	11.2667	32.6333
		96.154	17.5667	51.0333	83.3667	29		41.1	12.5333	36.2667
		96.41	10.7333	43.4667	79.3	22.0667		34.3667	13.8	43.9667
		96.667	10.5	34.5667	65.1	12.9		34.6	18.8667	48.6667
		96.923	16.5667	23.5667	48.7667	7.5667		40.8333	23.4333	47.6667
		97.179	28.9667	15.6	36.4333	10.7667		42.3667	22.2667	43.2667
		97.436	41.2667	9.1	32.2333	18.2667		41.9333	23.2333	35.1333
		97.692	46.3667	5.3	24.1333	27		37.9667	26.7	31.3
		97.949	38.6	3.7	13.2667	34.8333		36.1333	27.4667	34.2333
		98.205	20.4333	3.9667	4.7667	39.6333		34.7	30.9667	42.9333
		98.462	10.9	6.6667	0.7667	42.9333		32.8	39.8	48.9667
		98.718	7.2	12.4333	0	47.3333		31.6667	48.6667	50.9667
		98.974	7.9333	14.5667	0	49.5		35.9667	53.5	46.5333
		99.231	6.6667	12.2667	0	40.5667		45.3	55.7333	34.9333
		99.487	5.1333	8.4333	0	23.9		58.4	52.6	24.2
		99.744	4.0333	10.2	0	10.1		65.6	48.8	16.7333
		100	4.6667	14.2667	0	3.1333		67.6667	40.1333	22.7667
		100.256	5.0333	23.8333	0	0.5333		68.7	29.7667	41.9667
		100.513	3.6333	22.1667	0	0		70.1667	31.0667	58.7667
		100.769	0.7	13.6667	0	0		68.2667	40	61.6
		101.026	0.0333	3.8	0	0		59.4	44.4333	60.7667
		101.282	0	0.3667	0	0		50.5	48.0667	59.6
		101.538	0	0	0	0.0333		49.6333	40.3333	57.8333
		101.795	0	0	0	0.1333		46.4667	34.4	57.6333
		102.051	0	0.2333	0	0.2		39.6667	25.7333	63.5
		102.308	0	1.2	0	0.0333		27.1667	19.9333	68.1333
		102.564	0	5.7667	0	0		17.7333	20.4	70.8333
		102.821	0	10.2333	0.2333	0		11.9333	25.7667	69.1667
		103.077	0	10.0667	0.4	0		16.2	28.5333	61.7333
		103.333	0	6.0667	0.0667	0		28.6667	29.7667	44.1
		103.59	0	3.5667	0	0		45.9	27.8333	30.0333
		103.846	0.0333	3.0333	0	0		52.4	25.4333	31.4333
		104.103	0.5667	5.9667	0	0		40.9	22.7	51.0333
		104.359	1.7	6.5	0	0		23.3333	20.0667	70.7333
		104.615	3.3333	4.6333	1.7667	0		11.4667	19.9	77.6
		104.872	5.2667	2.1	3.1667	0.0333		5.0333	26.9667	75.6
		105.128	8.2333	0.5667	4.7667	0.0667		1.5333	45.1333	70.3
		105.385	10.8333	0.0333	8.8333	1		0.2333	63.6667	54.6
		105.641	13.5333	0	10.8	1.0667		0.7333	72.4667	32.8333
		105.897	17.1	0.3667	11.8333	0.5333		2.6667	67.1	16.9667
		106.154	14.4667	2.2333	6.2667	0.3333		5.4333	54.8667	9.7
		106.41	10.4	2.6	1.8667	0.3		10.0667	43.3333	7.2
		106.667	8.4667	0.5667	0.2	0.1333		14.8667	39.2333	7.3
		106.923	6.6	0	0	0.0333		19.1	36.6667	7.5
		107.179	4	0.0667	0	0		21.8333	28.4	7.1
		107.436	2.1333	0.4	0	0		22.6	27.3333	6.9333
		107.692	2.3333	0.5333	0	0.1333		22.9667	35.9	8.2667
		107.949	3.5333	0.3	0	0.7333		20.5667	42.2	14.4667
		108.205	4.8333	1.0667	0	1.0667		15.1333	44.9667	25.6333
		108.462	5.6	2.6333	0	0.6333		9.4333	43.9667	39.7
		108.718	7.9667	6.5667	0	0.1667		8.3	36.6333	47.1
		108.974	10.5333	13.5667	0	0.0333		12.2667	26.3667	49.1
		109.231	9.2333	28.3667	0	0		24.5333	20.3333	52.4667
		109.487	7.2	43.0333	0	0		31.8	20.4667	58.9
		109.744	5.9333	58.7333	0.0333	0		27.4333	26.6333	68.6333
		110	5	66.6	1.0333	0		14.3333	38.8	67.4667
		110.256	4.1	65.6	5.3667	0.2		5.2667	53.3333	53.8667
		110.513	3.3667	59.8667	15.1333	0.5		4.7	64.2	34.1333
		110.769	2.4	46.0333	24.7333	0.5333		13.6	64.5	23.1
		111.026	1.5667	28.9333	27.2	0.6		25	61.0333	20.6
		111.282	0.9667	15	18.0667	1.6		35.6667	50.7333	23.3
		111.538	0.5	8.9333	9.8333	2.9667		40.7	41.7	26.3
		111.795	0.3333	4.7667	3.7667	3.7667		45.6667	33.4	28.5667
		112.051	0.2333	2.1	0.9	3.4667		48.2333	30.3	33.5333
		112.308	0.0333	0.4667	0.2333	1.5333		39.8	25.7333	40.1
		112.564	0	0.0333	0.4667	0.3		29.7333	20.9	43.1667
		112.821	0.1333	0	1.7	0.0333		20.6	12.9667	40.4667
		113.077	0.6	0.1333	3.7667	0		20.3667	6.7667	46.4333
		113.333	1.4667	0	6.2667	0		28.1667	3.4667	59.6
		113.59	3.0667	0	10.3	0		27.9	2.8333	66.7
		113.846	5.5667	0	14.5333	0		20.0333	2.9667	69.9667
		114.103	9.4667	0	15.3667	0		15.5667	3.4333	67.0667
		114.359	17.3667	0.8667	17.6	0		16.4333	5.3333	66.6667
		114.615	26.9	3.9333	20.3	0.0333		16.4	10.4	68.3667
		114.872	30.7	9.2667	16.4333	0		18.7	18.7667	56.0667
		115.128	19.3	11.7667	9.3333	0.8333		24.5	35.6	36.8333
		115.385	7.1667	9.0333	3.6333	6.5667		22.8667	50.7333	19.4
		115.641	1.2667	5.6333	2.7	16.1667		14.2667	56.1	11.1667
		115.897	0.0667	2.7333	8.8	25.2		10.1	52.1667	9.8667
		116.154	0	1.1	18.3333	25.1		9.4333	38.9	15.9667
		116.41	0	0.4	27.4667	19.1667		9.4	22.8333	24.1333
		116.667	0	0.2333	36.3667	7.4667		9.3	14.5333	26.4
		116.923	0	0.0667	36.4333	5.6		7.4333	12	21.3667
		117.179	0	0	23.5333	13.2333		3.5667	15.8333	17.6
		117.436	0	0	13.9333	28.3333		1.0667	24.3	19
		117.692	0	0	11.2	32.7		0.1333	38.0333	20.4667
		117.949	0.4333	0	14.1667	25.4		0	40.9	19.9333
		118.205	2.2667	0	14.5	12.6		0	38.7667	16.8333
		118.462	3.1	0	7.2333	2.5333		0	29.0333	15.1667
		118.718	2.5667	0	1.4667	0.1667		0.2667	20.2	14.5
		118.974	0.9333	0	0.1	0		1.0667	16.0667	16.4
		119.231	0.2667	0	0	0		0.6333	14.8333	21.2
		119.487	1.0333	0	0	0		0.3667	13.5	28.9333
		119.744	1.6667	0.0667	0	0.0667		0.7667	12.6	34.8667
		120	0.4	0.6333	0	2.3		0.4333	7.7667	31.5
		120.256	0.2	0.4	0	6.7		0.6667	3.0667	26.6
		120.513	0.0667	0.0333	0.1667	13.3667		1.1667	0.7	19.4
		120.769	0.0333	0	0.7667	25.4333		1.1667	0.0667	14.4333
		121.026	0	0	1.1333	43.6667		1.2333	0	11.2
		121.282	0	0	0.4333	54.7667		1.4	0.0333	13.2667
		121.538	0	0	0.0667	54.4667		1.7	0.0667	28.6667
		121.795	0	0	0	47.4667		1.8	0.0333	51
		122.051	0	0.0333	0	33.5333		1.3333	0	65.6
		122.308	0	0.0333	0	18.7667		1.5333	0	63.0667
		122.564	0	0	0	8.4667		5.6667	0	53.5
		122.821	0.2333	0	0	3.1333		20.5667	0	37.1667
		123.077	1.6	0	0	2.2667		38.7667	0	26.5667
		123.333	3.4667	0	0	3.8333		51.0333	0	19.0333
		123.59	4.0667	0	0	7.1333		52.8667	0	16.7667
		123.846	2.8333	0	0	11.4333		52.5	0.3667	16.0667
		124.103	1.6667	0	0.2333	15.5667		55.5667	1.2	15.8667
		124.359	0.8	0	0.3333	26.4333		63.5667	1.9333	16.2667
		124.615	0.1667	0	0.0667	36.7667		73.1333	1.5667	18.1
		124.872	0	0.1333	0	30.9333		74.1333	4.7333	16.2667
		125.128	0	2.2333	0	19.7333		66.7667	12.4	16.0333
		125.385	0	6.1667	0.2333	11.0667		58.4333	26.4	23.9333
		125.641	0	6.2667	2.8	6.5667		53.1667	38.6667	35.8
		125.897	0	3.8667	6.7	3.7333		52.2667	46.7	44.5667
		126.154	0	1.6333	9.8667	2.2333		55.8667	48.5667	41.9333
		126.41	0	2.7	7.7333	0.9		49.2667	37.8	33.8
		126.667	0	7.0667	3.9	0.1		37	21.7333	28.3
		126.923	0	12.3	0.5333	0		46.1667	11.8333	27.8667
		127.179	0	16.9	0	0		65.8667	8.0333	24.2
		127.436	0	21.4	0	0		72.6333	7.9333	19.5
		127.692	0	18.9333	0	0		73.1333	9.1667	15.1667
		127.949	0	11.5667	0	0		65.6	16.5	12.5
		128.205	0	4.2333	0	0		52.7667	37.3	14.8
		128.462	0	0.5667	0	0		37.7667	60.5667	21.6333
		128.718	0	0	0	0		25.5667	68.7333	26.4667
		128.974	0	0	0	0		17	61.6667	28.2333
		129.231	0	0	0	0		10.3333	47.4333	24.1333
		129.487	0	0	1.5667	0		6.6667	36.5667	16.3
		129.744	0	0	6.9333	0		4.7667	29.2667	9.8667
		130	0	0	16.0667	0		3.9333	25.9333	5.7667
		130.256	0	0	24.8667	0.0333		3.6667	25.1333	2.9333
		130.513	0	0	24.8667	0		6.0667	23.7333	1
		130.769	0.3667	0	20.6	0		13.3	21.5	0.2
		131.026	0.8667	0	12.6333	0		18.6667	21.0333	0.1
		131.282	0.5333	0	5.9	0.2		20.1333	22.7	0.5667
		131.538	0.0667	0	1.7	0.0667		20.1333	26.4	1.4333
		131.795	0	0	0.2	0		27.2	26.4	2.1333
		132.051	0	0	0	0		35.7333	20.6667	2.1333
		132.308	0	0	0	0		42.5	13.3667	1.1
		132.564	0	0	0	0		38.7	8.5	0.2667
		132.821	0	0	0	0		28.1	4.9	0.7667
		133.077	0	0	0	0		17.3333	2.8667	3.0333
		133.333	0	0	0	0		11.2	1.6667	8.1667
		133.59	0	0	0	0		9.9667	1.3	16
		133.846	0	0	0	0		11.1667	0.8667	24.1333
		134.103	0.3333	0	0	0		18.5	0.3333	25.9333
		134.359	0.5667	0	0	0		21.9	0.0667	25.7
		134.615	0.2667	0	0	0		20.2333	0.4333	31.4667
		134.872	0.0667	0	0	0		15.0333	1.9333	45.2667
		135.128	0.1333	0	0.1	0		15.4667	3.2667	57.7667
		135.385	0.4667	0	0.0667	0		26.6333	5.9	58.0333
		135.641	0.5	0	3.0333	0		40.6667	17.4	55.8
		135.897	0.1667	0	9.3667	0		37.4	33.8667	50.5667
		136.154	0.2	0	11.8333	0		26.8333	45.5	46.1667
		136.41	0.8333	0	9.9333	0		17.7	46.5333	44.3333
		136.667	3.6667	0	4.7667	0		12.3667	38.9	32.9333
		136.923	7.8667	0	1.6	0		7.4333	27.3333	19.2
		137.179	11.6	0	1.2333	0		5.9667	16.7333	9.1
		137.436	14.7333	0	4.3333	0		6.3	10.9	4.0667
		137.692	16	0	9.8	0		3.2	9.7333	3.2
		137.949	16.1667	0	8.8667	0		0.8	12.0667	3.6333
		138.205	13.5	0	5.4667	0		0.8667	17.1	7.1
		138.462	11.3	0	2.5	0		3.7667	17.5	16.9333
		138.718	7.9667	0	3.2	0		6.9667	13.6	27.2667
		138.974	4.3	0	4.7667	0		8.6	11.5667	32.0333
		139.231	1.3333	0	5.2667	0		11.2333	9.7667	29.4667
		139.487	0.2	0	2.9333	0		15.2667	12.1	28.3667
		139.744	0	0	0.7	0		18.0333	16.3333	30.7667
		140	0	0	0.0667	0		20.0667	17.2333	38.6667
		140.256	0	0	0	0		18.4333	9.7	47.7667
		140.513	0	0	0	0		17.4	3.3	45.6
		140.769	0	0	0	0.3333		21.2333	1.4333	36.1333
		141.026	0	0	0	1.5		22.0667	3.1667	26.1333
		141.282	0	0	0	2.2333		21.1667	8.4333	18.8
		141.538	0	0	0	1.5667		19.8	18.2667	14.1333
		141.795	0.1	0	0	0.4667		23.4333	33.8667	13.0667
		142.051	0.1	0	1	0.0333		35.1	45.5	16.5667
		142.308	0	0	7.8	0		45.6	41.1	25.4667
		142.564	0	0	22.5333	0		45.6	28.1	37.0333
		142.821	0.7333	0	40.3333	0		34.7667	15.5667	47.8333
		143.077	1.9	0	56.9	0		23.3333	13.2333	46.8667
		143.333	1.5667	0	62.1667	0		14.6	21.5667	51.8
		143.59	0.4	1.6333	56.4667	0		11.0333	28.4	58.8333
		143.846	2	7.3667	42.4667	0		9.2333	28.2667	67.6333
		144.103	5.4	14.8333	27	0		7.6	19.6667	76.5
		144.359	9.2	21.5	14.8	0		4.9	11.9	82.3333
		144.615	10.5333	24.6	5.9	0		2.4333	8.4333	83.3
		144.872	11.1667	13.9333	1.2333	0		3	9.4	83.8
		145.128	7.9667	4.9667	0.0667	0		7	12.4667	81
		145.385	3.6667	0.7	0	0		15.3	15.8333	71.9333
		145.641	0.5667	0.1667	0	0		28.1667	20.4333	54.7
		145.897	0	0.7333	0	0		38.7333	32.6667	38.1
		146.154	0	0.9333	0	0		43.4	47.1333	34.4667
		146.41	0.0333	1.0667	0	0		43.1667	54.8333	37.2667
		146.667	0	0.5667	0	0		36.8	48.4	35.0333
		146.923	0.0667	0.0667	0	0		25.5667	35	23.6333
		147.179	0.1	0	0.1667	0		16.1	22.7667	12.6333
		147.436	0.1	0	5.2333	0		9	17.5	6
		147.692	0	0	19.0333	0		4.1667	22.7	3.3333
		147.949	0	0	37.6667	0		1.0333	29.2	1.1333
		148.205	0.7333	0	51.2667	0		0.0667	34.1333	0.2
		148.462	1.5333	0	54.7	0		0	37.3667	0.1333
		148.718	0.4667	0	53.3	0		0	38.3	0.2333
		148.974	0.0333	0	40.9667	0		0.1333	39.3333	2.3
		149.231	0	0	26.9	0		3.9	39.5667	10.9667
		149.487	0	1.7333	17.1	0		9.1667	36.5333	21
		149.744	0	4.5333	14.2	0		10.4667	28.4	24.7
		150	0	6.3333	11.5	0		7.2667	21.8667	21.9333
		150.256	0.1	6	9.6667	0		2.8667	17.4333	17.6333
		150.513	0.7667	7.2667	5.4	0		0.7667	16.5333	14.2333
		150.769	1.1333	8.1	1.7333	0		0.1	25.6333	13.4
		151.026	0.3333	5.9667	0.2333	0		0	41.3667	15.9667
		151.282	0	1.9	0.0333	0		0	50.3333	15.2
		151.538	0	0.1667	0	0		0	52.9667	11.7667
		151.795	0	0	0	0		0	46.1667	6.6333
		152.051	0	0	0	0		0	33.7333	3.7333
		152.308	0	0	0	0.1		0	18.9667	1.8333
		152.564	0	0	0	0		0	9.7667	0.7
		152.821	0	0	0	0		0.3333	8	0.2
		153.077	0	0	0	0		2.7667	13.7333	0
		153.333	0	0	0	0		6.0667	20.6667	0
		153.59	0	0	0	0		6.8333	23	0.0333
		153.846	0	0	0	0		6.2667	18.6333	0.3
		154.103	0	0	0	0		4.7	13.7333	1.6667
		154.359	0	0	0	0.1333		3.4333	12.7667	6.8667
		154.615	0	0	0	1.2		2.6333	17.5333	14.2333
		154.872	0	0	0	1.5		2.5667	27.8	19.3667
		155.128	0	0	0.8667	1.3		1.8	34.9	16.0667
		155.385	0	0	2.0667	0.9667		1.3667	29.3333	10.2333
		155.641	0	0	1.7667	0.1333		1.0333	18.6667	6.7333
		155.897	0	0	0.3	0		0.8667	11.8	3.9
		156.154	0	0	0	0		0.6	12.1333	2.0667
		156.41	0	0	0	0		0.9	13.5333	0.5
		156.667	0	0	0	0		4.8333	13.4	0
		156.923	0	0.0333	0	0		10.8333	13.1333	0
		157.179	0	0.8333	0	0		15.6333	11.8333	0
		157.436	0	2.0333	0	0		17.2667	9.1	0
		157.692	0	4.1	0.2	0		13.5667	7.9	0
		157.949	0	3.6667	0	0		13.7	8.6333	0
		158.205	0	1.4667	0	0		16.5667	9.2333	0
		158.462	0	0.7333	0	0		14.9333	6.5	0.5333
		158.718	0	0.1	0	0		10.7667	3.2	2.3667
		158.974	0	0	0	0		7.4667	1.1333	7.5
		159.231	0	0	0	0		6.6333	0.2	13.0333
		159.487	0.4	0	0	0		8.3	0	12.6667
		159.744	1.4667	0	0	0		10.7	0	11.1
		160	3.0667	0	0	0		15.3667	0	6.7333
		160.256	5.4	0	0	0		26.1333	0.5	2.4
		160.513	9.7333	0	0	0		40.9333	3.3	0.5333
		160.769	16.9	0	0	0		49.1333	11.6	0.0667
		161.026	17.9333	0	0	0		47.8333	29.3667	0
		161.282	0.6333	0	0	0		35.7667	48.6667	0
		161.538	4.2667	0	0	0		22.7667	62.1	0
		161.795	0.6333	0	0	0		14.7667	63.8667	0
		162.051	0	0	0	0		10.0667	51.6667	0
		162.308	0	0	0	0		6.2333	34.2333	0
		162.564	0	0.1333	0	0		3.1333	19.4	1.4
		162.821	0	0.1333	0	0		4.7	15.2333	5.6333
		163.077	0	0.0333	0	0		7.1333	15.3	13.3667
		163.333	0	0.0333	0	0		7.3667	15.7333	15.4
		163.59	0	0	0	0		5.0333	13.5	12.2
		163.846	0	0	0	0		1.7333	8.6667	7.6333
		164.103	0	0.0333	0	0		0.5	5.2	4.0333
		164.359	0	0.0333	0	0		0.4	2.8667	1.8667
		164.615	0	0	0	0		0.2	1.9	0.3
		164.872	0	0	0	0		0.0333	1.2667	0
		165.128	0	0	0	0		0	1.1333	0
		165.385	0	0	0	0		0	2.1	0
		165.641	0	0	0	0		0	2.7333	0
		165.897	0	0	0.01	0		0	2.6333	0
