# Supplementary material for: Giant ankyrin-B mediates transduction of axon guidance and collateral branch pruning factor sema 3A
Source: eLife journal article supplement (doi:10.7554/elife.69815), 2021-11-08
Supplement: fig5-data1 [file Figure 5-Figure Supplement 2-source data 4.xlsx]

## Sheet: Figure 5-Figure Supp 2
			% GC collapsed
		Treatment	Control				AnkB440 KO
		Untreated	35	37.5	37		35	38	43
		Ephrin A5	62.5	63.4	60.6		65	60	61
			% GC collapsed
		Treatment	Control				L1CAM Y1229H
		Untreated	32.5	31.92	30.81		33.8	35.7	38.2
		Ephrin A5	64.1	60.34	62.93		57.89	54.93	62.78
