# Supplementary material for: Giant ankyrin-B mediates transduction of axon guidance and collateral branch pruning factor sema 3A
Source: eLife journal article supplement (doi:10.7554/elife.69815), 2021-11-08
Supplement: fig5-data1 [file Figure 5-source data 1.xlsx]

## Sheet: Figure 5
						% GC collapsed
					Sema 3A (min)	Control				AnkB220 KO
					0	22.9	24.5	25.6		21.8	22.6	21.1
					5	39.1	43.2	45.6		41.1	44.3	41.2
					15	45.9	48.9	52.3		56.1	54.6	51.2
					30	47.9	48.4	50.4		49.6	48.5	49.9
						% GC collapsed
					Sema 3A (min)	Control				AnkB KO
					0	16.0784	18.3833	13.7736		17.1233	20.2517	13.9949
					5	38.5246	41.6465	35.4027		29.6748	32.5933	26.7563
					15	53.629	56.8021	50.456		38.0392	41.0854	34.993
					30	58.4475	61.7852	55.1097		31.9328	34.9612	28.9044
						% GC collapsed
					Sema 3A (min)	Control				AnkB440 KO
					0	22.3	21.4	23.5		25	21.2	28.4
					5	45.3	49	41.6		41.6	39.8	36.8
					15	57.8	52.5	63.6		35.2	34.6	36
					30	56.3	51.4	61.5		36.2	35.9	35.5
						% GC collapsed
						WT AnkB440-Halo				WT AnkB220-GFP
					Untreated	42.5	32.1	40		33.8	35	40
					Sema 3A	62.5	66.7	57.5		41.1	35.9	42
