# Supplementary material for: Giant ankyrin-B mediates transduction of axon guidance and collateral branch pruning factor sema 3A
Source: eLife journal article supplement (doi:10.7554/elife.69815), 2021-11-08
Supplement: fig6-data1 [file Figure 6-Figure Supplement 1-source data 1.xlsx]

## Sheet: Figure 6-Figure Supp 1
		L1CAM membrane targeted					L1CAM diffused					AnkB220-GFP membrane targeted					AnkB220-GFP diffused					AnkB440-GFP membrane targeted					AnkB440-GFP diffused					AnkB220-GFP + L1CAM membrane targeted					AnkB220-GFP + L1CAM diffused					AnkB440-GFP + L1CAM membrane targeted					AnkB440-GFP + L1CAM diffused
		100	100	95			0	0	5			0	0	0			100	100	100			0	0	0			100	100	100			5	3	5			95	97	95			90	88	92			10	12	8
