# Supplementary material for: Giant ankyrin-B mediates transduction of axon guidance and collateral branch pruning factor sema 3A
Source: eLife journal article supplement (doi:10.7554/elife.69815), 2021-11-08
Supplement: fig6-data1 [file Figure 6-source data 1.xlsx]

## Sheet: Figure 6
			% GC collapsed (axon)
			Control				L1CAMY1229H
		Untreated	37.5	32.5	27.5	28.2	37.5	25	28.5
		+Sema 3A	51.15	49.5	62.5	67.5	35	22.5	37.5
			% GC collapsed (axonal branches)
			Control			AnkB440 KO			L1CAMY1229H
		Untreated	40	42	45	36	40	39	42.5	40	45
		+Sema 3A	75	65	75	43	50	45	42.5	50	52.5
