# Supplementary material for: Giant ankyrin-B mediates transduction of axon guidance and collateral branch pruning factor sema 3A
Source: eLife journal article supplement (doi:10.7554/elife.69815), 2021-11-08
Supplement: fig7-data1 [file Figure 7-Figure Supplement 1-source data 1.xlsx]

## Sheet: Figure 7-Fig Supp 1
			% GC collapsed
			Control					β2-Spectrin KO
		Untreated	37.5	32.5	27.5	28.2		36.5	30	35
		Sema 3A	46.1	47.5	62.5	67.5		47.5	62.5	57.5
			% GC collapsed
			AnkB440 KO + PSK AnkB440-Halo
		Untreated	32.5	30	30
		Sema 3A	57.5	60	55
