# Supplementary material for: Giant ankyrin-B mediates transduction of axon guidance and collateral branch pruning factor sema 3A
Source: eLife journal article supplement (doi:10.7554/elife.69815), 2021-11-08
Supplement: fig7-data1 [file Figure 7-source data 11.xlsx]

## Sheet: Figure 7
												PLA signal (surface Nrp1-L1CAM)
			% expression in AnkB440 cortex relative to control									Control	AnkB440 KO	L1CAMY1229H
			L1CAM	Sema 3A	Nrp1	Plexin A1						4.1512	0.036612	0.971238
			98.8495	157.067	121.736	114.94						3.58125	0.063796	1.79204
			102.994	142.455	121.812	114.124						6.93978	0.067154	1.86506
			118.171	133.99	146.809	97.4976						6.75159	0.030167	0.962703
												3.30623	0.47408	1.54998
												12.2765	0.324171	1.52274
			% expression in AnkB440 neurons relative to control									10.6189	1.07211	1.28303
		Target	Total				Surface						12.1757	0.207481	1.51045
		L1CAM	92.5	89.4	101.7		49.2	56.8	52.4				8.31646	0.142182	2.13687
		Nrp1	120.3	124.5	127.9		30.9	43.9	41.6				3.50779	0.186009	1.90272
		Plexin A1	95.4	97.2	101.87		104.6	98.5	97.4				10.2152	0.188551	2.79882
		GluR1	99.6	98.4	99.3		87.7	89.8	96.4				9.7844	1.51045	2.04483
												9.5431	0.865057	2.32303
												8.4912	0.792042	2.78932
												9.56912	0.782133	0.67321
												7.67321		1.96721
														2.46124
	Sema 3A	Control					AnkB440 KO				L1CAMY1229H
	UT	23038.1	20678.1	22127.1	24730.5		7607.72	17307.3	11107.7		9466.72	14043.2	16293.3
	5 min	7612.58	9592.73	10941.8			8563.18	15667.1	10648.2		9527.88	11613.1	10903.2
