# Supplementary material for: Giant ankyrin-B mediates transduction of axon guidance and collateral branch pruning factor sema 3A
Source: eLife journal article supplement (doi:10.7554/elife.69815), 2021-11-08
Supplement: fig8-data1 [file Figure 8-source data 6.xlsx]

## Sheet: Figure 8
		% expression in AnkB440 cortex relative to control				Control				pCofilinS3 signal/GC area
		LIMK1	Cofilin		pCofilinS3/cofilin	100	100	100		Control	Control-Sema3A 1min	Control-Sema3A 5min	AnkB440 KO	AnkB440 KO-Sema3A 1min	AnkB440 KO-Sema3A 5min	L1CAMY1229H	L1CAMY1229H Sema3A 1 min	L1CAMY1229H Sema3A 5min
		110.734	101.83			AnkB440 KO				6.792	16.672	2.266	3.453	3.083	4.093	3.351	6.797	6.418
		90.0463	110.755			62.7	50.3	60.2		5.234	19.441	2.395	3.892	8.304	3.539	2.672	7.51	3.796
		92.484	106.138							8.762	15.782	2.147	2.451	6.852	5.429	3.891	7.21	4.665
										6.349	19.141	2.426	1.902	4.222	5.2	3.892	6.232	6.307
										3.254	16.454	2.468	4.781	5.671	3.937	3.023	6.169	5.555
										3.892	19.789	1.936	2.562	3.946	4.22	3.782	7.6	7.366
										4.812	15.141	2.392	1.891	6.672	3.8	3.342	7.875	4.209
										5.032	16.318	1.106	2.834	6.356	5.505	3.177	7.473	5.089
										5.712	14.103	2.048	4.796	5.869	3.718	2.325	8.463	5.327
										5.652	22.625	1.636	3.672	4.709	4.177	4.306	8.717	5.517
										2.453	17.395	2.579	1.891	4.312	4.078	2.649	8.891	5.332
										8.297	17.673	1.59	3.229	7.671	3.449	2.701	8.755	8.374
										4.84	19.255	2.6	3.338	5.896	3.404	3.599	5.192	6.905
										7.034	20.995	2.386	3.672	2.406	3.632	3.788	5	8.51
										4.917	14.157	2.027	3.105	3.261	5.313	2.908	5.903	7.803
										5.183	16.849	1.704	2.97	6.368	3.89	3.488	6.432	7.699
										6.891	20.16	5.429	2.286	7.707	4.961	5.882	7.754	3.131
										5.782	16.658	1.201	2.077	2.058	5.849	5.021	6.032	4.794
											17.359	1.279	4.723	3.677	4.508	5.882	4.494	5.861
											16.974	1.697	5.021	6.276	4.979	3.504	6.641	5.899
											13.19	3.294	4.413	6.639	5.646	5.559	6.302	3.339
											15.544	3.007		3.831	4.226	3.005	7.193	6.477
											18.315	2.205		7.636	4.418	2.703	7.331	3.532
											25.435	2.338		5.056	3.796	4.476		6.083
											16.335	4.203		7.442	5.02	4.768		4.17
											19.145	2.971		7.613	3.665	3.558		5.798
											17.148	2.949		7.654	6.307	4.418		3.637
											18.853	2.178		8.782	3.666	3.442		4.093
												3.245		7.902	7.366	4.641		7.796
														9.021	5.09			6.741
															4.089			9.664
															5.327			5.576
															3.517			6.146
															4.332			5.432
															8.374
															6.905
															5.861
															5.794
															5.902
															6.643
