# Supplementary material for: Giant ankyrin-B mediates transduction of axon guidance and collateral branch pruning factor sema 3A
Source: eLife journal article supplement (doi:10.7554/elife.69815), 2021-11-08
Supplement: fig9-data1 [file Figure 9-source data 6.xlsx]

## Sheet: Figure 9
					Control					AnkB440 R2589fs
				-Sema3A	31.5	30.5	28.5	30.5		37.4	34	30.7	35
				+Sema 3A	66.1	47.5	65.5	62.5		44.4	41.1	40.2	35
					% GG collapsed
					WT AnkB440-Halo				AnkB440 R1145Q-Halo				AnkB440 P1843S-Halo				AnkB440 E3429V-Halo
				-Sema3A	42.5	32.1	40		39	28	37		21.1	30	32.5		27.9	34	32.2
				+Sema 3A	62.5	66.7	57.5		50	30	37		18.9	34	32.9		32	39.87	35.2
